# Supplementary material for: Mutant p53R211* ameliorates inflammatory arthritis in AIA rats via inhibition of TBK1-IRF3 innate immune response
Source: Inflamm Res. 2023 Nov 8;72(12):2199–219. doi: 10.1007/s00011-023-01809-w (PMC10656327; doi:10.1007/s00011-023-01809-w)
Supplement: Supplementary file 1 — Supplementary file1 (DOCX 3182 KB) [file 11_2023_1809_MOESM1_ESM.docx]

Supplementary Material

**Mutant p53R211* ameliorates inflammatory arthritis in AIA rats *via* inhibition of TBK1-IRF3 innate immune response**

**Yaling Zeng1, Jerome P. L. Ng1, Linna Wang1, Xiongfei Xu1, Betty Yuen Kwan Law1, Guobing Chen2, Hang Hong Lo1,** **Lijun Yang1, Jiujie Yang1, Lei Zhang1, Liqun Qu****1, Xiaoyun Yun1, Jing Zhong1, Ruihong Chen1, Dingqi Zhang1,** **Yuping Wang1, Weidan Luo1,** **Congling Qiu2, Baixiong Huang1, Wenfeng liu3, Liang Liu1*,** **Vincent Kam Wai Wong1***

1Dr. Neher’s Biophysics Laboratory for Innovative Drug Discovery, State Key Laboratory of Quality Research in Chinese Medicine, Macau University of Science and Technology, Macau 999078, China

2Department of Microbiology and Immunology, Institute of Geriatric Immunology, School of Medicine, Jinan University, Guangzhou 510630, China

3School of Biotechnology and Health Sciences, Wuyi University, Jiangmen 529020, China

*** Corresponding authors:**Vincent Kam Wai Wong
bowaiwong@gmail.com

Liang Liu

lliu@must.edu.mo

Tel: +853-8897-2408 (VKWW); +853-8897-2238 (LL)

Fax: +853-2882-2799 (VKWW); +853-2882-3312 (LL)

Context

[1 Supplementary Data 2](#_Toc127799169)

[1.1 Supplementary Figures 2](#_Toc127799170)

[1.2 Supplementary Tables 2](#_Toc127799171)

[1.3 Original western blot for three repeats 5](#_Toc127799172)

# Supplementary Data

## Supplementary Figures


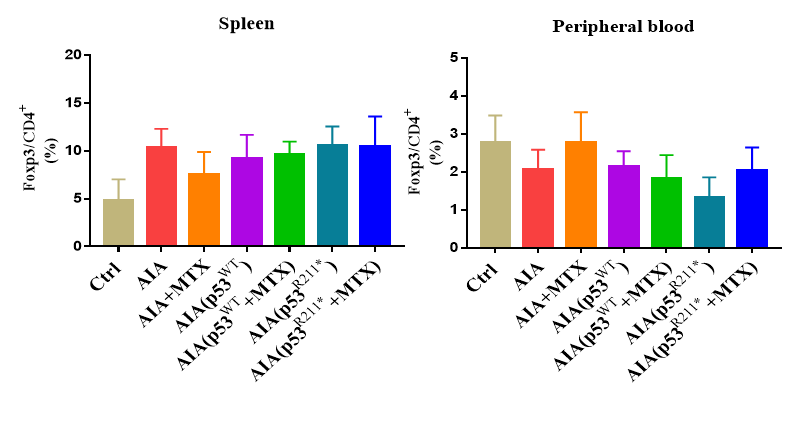


**Supplementary Figure S1.** The immunomodulatory effect of intra-articular injection of AAV-p53R211* on Treg cells in AIA rats. Flow cytometric analysis of Treg cells from rat peripheral blood and spleen of seven animal groups. Treg cells were identified by intracellular staining of anti-Foxp3 antibody. Foxp3+ Tregs were gated on CD4+ T cell. The bar charts show the percentage of Foxp3 among CD4+ T lymphocytes. The data are expressed as mean ± SEM (n =6-8). The statistical analysis is performed by one-way ANOVA.

## Supplementary Tables

**Supplementary Table S1:** **p53 mutants cause HCQ/FK506/CSA/LEF-resistant phenotype in RAFLS.**

| Mutant | HCQ IC50 | | | RF | FK506 IC50 | | | RF | CSA IC50 | | | RF | LEF IC50 | | | RF |
| --- | --- | --- | --- | --- | --- | --- | --- | --- | --- | --- | --- | --- | --- | --- | --- | --- |
| CTRL | 46.83 | ± | 5.52 |  | 71.10 | ± | 3.05 |  | 16.53 | ± | 1.75 |  | 527.67 | ± | 36.25 |  |
| WT | 40.00 | ± | 3.86 | 0.85 | 67.13 | ± | 10.22 | 0.94 | 15.87 | ± | 3.03 | 0.96 | 516.67 | ± | 41.67 | 0.98 |
| V73M | 58.97 | ± | 17.21 | 1.47 | 58.20 | ± | 3.47 | 0.87 | 20.33 | ± | 0.58 | 1.28 | 456.33 | ± | 30.92 | 0.88 |
| P75L | 35.80 | ± | 0.35 | 0.90 | 97.00 | ± | 1.23 | 1.44 | 18.93 | ± | 0.58 | 1.19 | 930.67 | ± | 50.29 | 1.80 |
| S99P | 31.13 | ± | 0.38 | 0.78 | 82.97 | ± | 0.95 | 1.24 | 22.03 | ± | 1.33 | 1.39 | 669.00 | ± | 31.43 | 1.29 |
| K101E | 37.47 | ± | 0.68 | 0.94 | 77.20 | ± | 9.66 | 1.15 | 12.50 | ± | 1.00 | 0.79 | 636.33 | ± | 4.16 | 1.23 |
| A119T | 80.47 | ± | 0.80 | 2.01 | 74.70 | ± | 4.19 | 1.11 | 24.20 | ± | 3.86 | 1.53 | 770.33 | ± | 8.14 | 1.49 |
| K120E | 29.87 | ± | 1.80 | 0.75 | 79.70 | ± | 3.50 | 1.19 | 14.00 | ± | 1.78 | 0.88 | 934.00 | ± | 52.00 | 1.81 |
| S121P | 76.83 | ± | 4.72 | 1.92 | 148.67 | ± | 9.29 | 2.21 | 13.87 | ± | 0.21 | 0.87 | 341.67 | ± | 6.11 | 0.66 |
| T123A | 32.83 | ± | 1.04 | 0.82 | 78.17 | ± | 1.88 | 1.16 | 10.87 | ± | 0.12 | 0.68 | 642.00 | ± | 25.36 | 1.24 |
| T125M | 32.27 | ± | 0.76 | 0.81 | 98.27 | ± | 1.33 | 1.46 | 13.07 | ± | 1.75 | 0.82 | 671.33 | ± | 25.15 | 1.30 |
| P128T | 28.07 | ± | 1.50 | 0.70 | 12.43 | ± | 0.91 | 0.19 | 31.13 | ± | 1.03 | 1.96 | 978.33 | ± | 26.31 | 1.89 |
| K132E | 32.10 | ± | 1.08 | 0.80 | 116.67 | ± | 7.77 | 1.74 | 12.07 | ± | 0.95 | 0.76 | 570.33 | ± | 62.01 | 1.10 |
| F134L | 33.97 | ± | 0.06 | 0.85 | 106.33 | ± | 0.58 | 1.58 | 26.47 | ± | 4.15 | 1.67 | 635.67 | ± | 24.83 | 1.23 |
| A138V | 26.07 | ± | 3.88 | 0.65 | 113.67 | ± | 0.58 | 1.69 | 34.00 | ± | 2.40 | 2.14 | 704.67 | ± | 5.69 | 1.36 |
| A138T | 25.60 | ± | 6.39 | 0.64 | 54.27 | ± | 1.10 | 0.81 | 19.00 | ± | 1.57 | 1.20 | 743.67 | ± | 108.84 | 1.44 |
| K139R | 21.23 | ± | 0.32 | 0.53 | 94.03 | ± | 11.04 | 1.40 | 23.27 | ± | 0.51 | 1.47 | 711.00 | ± | 121.24 | 1.38 |
| C141Y | 31.90 | ± | 3.10 | 0.80 | 101.67 | ± | 2.08 | 1.51 | 23.03 | ± | 4.88 | 1.45 | 652.00 | ± | 34.87 | 1.26 |
| P142S | 19.60 | ± | 1.51 | 0.49 | 89.63 | ± | 3.27 | 1.34 | 20.70 | ± | 1.40 | 1.30 | 632.67 | ± | 57.55 | 1.22 |
| V143M | 39.00 | ± | 3.47 | 0.98 | 73.17 | ± | 3.40 | 1.09 | 14.40 | ± | 1.35 | 0.91 | 678.33 | ± | 19.50 | 1.31 |
| Q144* | 35.40 | ± | 2.91 | 0.89 | 98.83 | ± | 4.65 | 1.47 | 12.17 | ± | 0.42 | 0.77 | 674.33 | ± | 10.60 | 1.31 |
| W146* | 20.97 | ± | 0.46 | 0.52 | 74.67 | ± | 3.70 | 1.11 | 20.93 | ± | 2.10 | 1.32 | 695.67 | ± | 25.77 | 1.35 |
| V147I | 20.40 | ± | 0.70 | 0.51 | 69.60 | ± | 2.81 | 1.04 | 21.07 | ± | 0.29 | 1.33 | 653.00 | ± | 3.00 | 1.26 |
| D148G | 43.27 | ± | 0.06 | 1.08 | 88.97 | ± | 1.76 | 1.33 | 16.10 | ± | 0.26 | 1.01 | 688.67 | ± | 53.15 | 1.33 |
| S149 | 22.77 | ± | 1.16 | 0.57 | 71.07 | ± | 7.71 | 1.06 | 17.67 | ± | 0.50 | 1.11 | 689.67 | ± | 8.96 | 1.33 |
| P151S | 19.77 | ± | 1.25 | 0.49 | 169.33 | ± | 10.69 | 2.52 | 14.67 | ± | 2.12 | 0.92 | 674.00 | ± | 8.72 | 1.30 |
| P151L | 20.80 | ± | 0.85 | 0.52 | 248.33 | ± | 4.51 | 3.70 | 12.83 | ± | 2.30 | 0.81 | 881.33 | ± | 27.02 | 1.71 |
| P152 | 42.67 | ± | 0.32 | 1.07 | 259.67 | ± | 3.51 | 3.87 | 20.37 | ± | 2.72 | 1.28 | 587.33 | ± | 11.59 | 1.14 |
| P153S | 66.90 | ± | 0.75 | 1.67 | 96.17 | ± | 2.47 | 1.43 | 15.67 | ± | 0.99 | 0.99 | 701.00 | ± | 16.09 | 1.36 |
| T155A | 19.40 | ± | 0.66 | 0.49 | 56.30 | ± | 2.23 | 0.84 | 14.60 | ± | 0.17 | 0.92 | 591.67 | ± | 49.80 | 1.15 |
| T155I | 36.57 | ± | 2.39 | 0.91 | 77.83 | ± | 1.65 | 1.16 | 28.17 | ± | 0.38 | 1.78 | 792.33 | ± | 12.70 | 1.53 |
| R156H | 49.53 | ± | 0.55 | 1.24 | 57.30 | ± | 0.30 | 0.85 | 13.37 | ± | 1.37 | 0.84 | 476.67 | ± | 135.71 | 0.92 |
| R156C | 53.27 | ± | 0.06 | 1.33 | 123.67 | ± | 1.53 | 1.84 | 17.77 | ± | 0.15 | 1.12 | 653.67 | ± | 37.82 | 1.27 |
| V157I | 30.03 | ± | 0.45 | 0.75 | 78.47 | ± | 2.48 | 1.17 | 19.27 | ± | 0.87 | 1.21 | 663.33 | ± | 11.68 | 1.28 |
| R158L | 51.90 | ± | 2.16 | 1.30 | 76.37 | ± | 8.37 | 1.14 | 14.10 | ± | 2.15 | 0.89 | 708.33 | ± | 35.22 | 1.37 |
| R158H | 55.37 | ± | 4.04 | 1.38 | 55.93 | ± | 4.24 | 0.83 | 15.43 | ± | 1.44 | 0.97 | 617.67 | ± | 11.59 | 1.20 |
| M160I | 57.50 | ± | 1.40 | 1.44 | 103.00 | ± | 1.00 | 1.53 | 9.37 | ± | 0.69 | 0.59 | 406.00 | ± | 9.85 | 0.79 |
| A161V | 53.83 | ± | 6.38 | 1.35 | 63.87 | ± | 0.61 | 0.95 | 23.07 | ± | 0.21 | 1.45 | 583.00 | ± | 12.53 | 1.13 |
| A161T | 51.80 | ± | 2.21 | 1.30 | 117.33 | ± | 3.79 | 1.75 | 14.47 | ± | 1.94 | 0.91 | 852.67 | ± | 95.77 | 1.65 |
| A161P | 58.13 | ± | 2.72 | 1.45 | 72.20 | ± | 7.79 | 1.08 | 15.10 | ± | 0.66 | 0.95 | 465.33 | ± | 19.22 | 0.90 |
| Q167R | 52.87 | ± | 1.42 | 1.32 | 47.23 | ± | 0.59 | 0.70 | 12.33 | ± | 0.06 | 0.78 | 665.00 | ± | 7.94 | 1.29 |
| H168R | 56.23 | ± | 0.25 | 1.41 | 49.13 | ± | 1.68 | 0.73 | 14.53 | ± | 0.45 | 0.92 | 358.00 | ± | 7.94 | 0.69 |
| H168Y | 17.60 | ± | 1.15 | 0.44 | 88.33 | ± | 1.40 | 1.32 | 23.07 | ± | 1.46 | 1.45 | 669.00 | ± | 37.40 | 1.29 |
| V172A | 29.97 | ± | 1.86 | 0.75 | 103.30 | ± | 7.61 | 1.54 | 12.77 | ± | 2.37 | 0.80 | 611.00 | ± | 130.43 | 1.18 |
| R174S | 40.07 | ± | 0.06 | 1.00 | 103.20 | ± | 6.79 | 1.54 | 19.67 | ± | 3.74 | 1.24 | 747.67 | ± | 101.01 | 1.45 |
| C176Y | 61.73 | ± | 4.54 | 1.54 | 142.33 | ± | 25.72 | 2.12 | 13.70 | ± | 2.34 | 0.86 | 763.67 | ± | 52.84 | 1.48 |
| P177T | 13.90 | ± | 0.61 | 0.35 | 58.70 | ± | 2.09 | 0.87 | 23.03 | ± | 1.96 | 1.45 | 567.00 | ± | 45.13 | 1.10 |
| H178ds | 35.07 | ± | 0.32 | 0.88 | 76.80 | ± | 3.40 | 1.14 | 21.97 | ± | 0.90 | 1.38 | 849.67 | ± | 88.01 | 1.64 |
| H178R | 48.00 | ± | 5.27 | 1.20 | 128.67 | ± | 13.32 | 1.92 | 15.17 | ± | 2.15 | 0.96 | 593.67 | ± | 79.05 | 1.15 |
| S183L | 44.50 | ± | 2.17 | 1.11 | 108.00 | ± | 6.93 | 1.61 | 14.63 | ± | 1.96 | 0.92 | 751.67 | ± | 63.57 | 1.45 |
| D186N | 69.63 | ± | 2.66 | 1.74 | 91.67 | ± | 0.58 | 1.37 | 34.93 | ± | 6.02 | 2.20 | 960.33 | ± | 26.41 | 1.86 |
| A189T | 70.83 | ± | 2.45 | 1.77 | 96.43 | ± | 3.35 | 1.44 | 13.17 | ± | 2.82 | 0.83 | 953.33 | ± | 38.81 | 1.85 |
| Q192L | 45.97 | ± | 3.41 | 1.15 | 64.27 | ± | 21.95 | 0.96 | 10.30 | ± | 1.05 | 0.65 | 678.67 | ± | 13.28 | 1.31 |
| H193Y | 40.17 | ± | 1.16 | 1.00 | 154.33 | ± | 16.86 | 2.30 | 18.77 | ± | 2.25 | 1.18 | 521.67 | ± | 44.97 | 1.01 |
| L194F | 73.30 | ± | 1.78 | 1.83 | 109.90 | ± | 17.48 | 1.64 | 12.97 | ± | 4.33 | 0.82 | 536.33 | ± | 85.05 | 1.04 |
| R196* | 61.30 | ± | 2.36 | 1.53 | 81.53 | ± | 1.71 | 1.21 | 16.97 | ± | 1.33 | 1.07 | 690.00 | ± | 64.28 | 1.34 |
| R202C | 48.83 | ± | 5.82 | 1.22 | 88.03 | ± | 2.73 | 1.31 | 18.07 | ± | 1.04 | 1.14 | 597.33 | ± | 83.07 | 1.16 |
| R202S | 37.07 | ± | 1.10 | 0.93 | 138.67 | ± | 8.50 | 2.07 | 14.60 | ± | 0.30 | 0.92 | 276.33 | ± | 15.18 | 0.53 |
| T211I | 47.83 | ± | 3.95 | 1.20 | 90.17 | ± | 1.21 | 1.34 | 13.77 | ± | 0.64 | 0.87 | 618.67 | ± | 31.53 | 1.20 |
| R213* | 73.87 | ± | 20.45 | 1.85 | 149.00 | ± | 6.93 | 2.22 | 36.17 | ± | 0.874 | 2.28 | 966.33 | ± | 12.70 | 1.87 |
| V217M | 74.00 | ± | 27.46 | 1.85 | 95.50 | ± | 1.73 | 1.42 | 24.80 | ± | 0.17 | 1.56 | 386.33 | ± | 5.51 | 0.75 |
| E221* | 30.57 | ± | 0.93 | 0.76 | 77.13 | ± | 1.79 | 1.15 | 10.05 | ± | 0.69 | 0.63 | 378.33 | ± | 19.86 | 0.73 |
| P223H | 39.77 | ± | 0.46 | 0.99 | 75.87 | ± | 2.15 | 1.13 | 18.67 | ± | 0.71 | 1.18 | 584.67 | ± | 46.19 | 1.13 |
| G226D | 52.60 | ± | 7.69 | 1.32 | 84.00 | ± | 5.48 | 1.25 | 16.70 | ± | 0.95 | 1.05 | 480.33 | ± | 102.26 | 0.93 |
| S227P | 81.53 | ± | 3.76 | 2.04 | 94.17 | ± | 1.26 | 1.40 | 16.50 | ± | 0.26 | 1.04 | 820.00 | ± | 148.84 | 1.59 |
| D228 | 60.53 | ± | 5.87 | 1.51 | 92.63 | ± | 1.76 | 1.38 | 29.43 | ± | 1.37 | 1.86 | 507.67 | ± | 41.40 | 0.98 |
| C229 | 67.10 | ± | 1.61 | 1.68 | 83.43 | ± | 1.43 | 1.24 | 18.70 | ± | 3.73 | 1.18 | 539.00 | ± | 84.12 | 1.04 |
| T231I | 58.43 | ± | 3.01 | 1.46 | 81.13 | ± | 7.67 | 1.21 | 16.20 | ± | 1.45 | 1.02 | 409.33 | ± | 135.00 | 0.79 |
| I232M | 78.70 | ± | 1.48 | 1.97 | 87.67 | ± | 1.37 | 1.31 | 8.73 | ± | 0.29 | 0.55 | 270.00 | ± | 61.51 | 0.52 |
| H233R | 45.23 | ± | 1.86 | 1.13 | 59.93 | ± | 3.05 | 0.89 | 15.73 | ± | 1.56 | 0.99 | 657.00 | ± | 33.87 | 1.27 |
| Y234C | 27.87 | ± | 2.87 | 0.70 | 151.67 | ± | 10.07 | 2.26 | 8.53 | ± | 0.90 | 0.54 | 264.67 | ± | 42.72 | 0.51 |
| N235D | 26.93 | ± | 1.56 | 0.67 | 151.67 | ± | 14.01 | 2.26 | 8.82 | ± | 1.03 | 0.56 | 246.00 | ± | 140.27 | 0.48 |
| N235I | 36.37 | ± | 2.32 | 0.91 | 93.27 | ± | 2.63 | 1.39 | 12.80 | ± | 0.36 | 0.81 | 592.00 | ± | 90.42 | 1.15 |
| N235S | 55.67 | ± | 2.96 | 1.39 | 77.40 | ± | 2.40 | 1.15 | 24.33 | ± | 1.17 | 1.53 | 654.67 | ± | 52.52 | 1.27 |
| M237T | 59.73 | ± | 3.63 | 1.49 | 78.60 | ± | 2.14 | 1.17 | 13.23 | ± | 3.82 | 0.83 | 309.00 | ± | 91.07 | 0.60 |
| C238Y | 35.50 | ± | 0.40 | 0.89 | 112.00 | ± | 1.00 | 1.67 | 18.70 | ± | 0.66 | 1.18 | 637.00 | ± | 15.59 | 1.23 |
| N239S | 80.00 | ± | 4.23 | 2.00 | 147.67 | ± | 7.57 | 2.20 | 31.10 | ± | 0.85 | 1.96 | 981.00 | ± | | 1.90 |
| M234V | 48.80 | ± | 5.84 | 1.22 | 77.53 | ± | 2.44 | 1.15 | 13.37 | ± | 2.22 | 0.84 | 485.00 | ± | 113.96 | 0.94 |
| G244D | 48.87 | ± | 3.10 | 1.22 | 142.00 | ± | 1.73 | 2.12 | 18.30 | ± | 3.44 | 1.15 | 705.67 | ± | 2.52 | 1.37 |
| G245D | 39.23 | ± | 0.71 | 0.98 | 93.07 | ± | 5.90 | 1.39 | 19.03 | ± | 0.31 | 1.20 | 461.33 | ± | 40.55 | 0.89 |
| M246V | 37.00 | ± | 2.21 | 0.93 | 96.40 | ± | 24.17 | 1.44 | 13.33 | ± | 0.57 | 0.84 | 566.67 | ± | 25.70 | 1.10 |
| R248Q | 94.47 | ± | 3.86 | 2.36 | 294.33 | ± | 4.73 | 4.38 | 81.03 | ± | 4.21 | 5.11 | >1000 | ± | |  |
| R248W | 83.80 | ± | 1.47 | 2.10 | 146.33 | ± | 3.21 | 2.18 | 59.37 | ± | 10.24 | 3.74 | >1000 | ± | |  |
| R249G | 29.80 | ± | 3.08 | 0.75 | 31.13 | ± | 1.03 | 0.46 | 7.05 | ± | 0.36 | 0.44 | 270.67 | ± | 63.52 | 0.52 |
| P250L | 72.00 | ± | 0.61 | 1.80 | 215.67 | ± | 38.84 | 3.21 | 7.97 | ± | 0.94 | 0.50 | 619.00 | ± | 7.81 | 1.20 |
| I251M | 29.87 | ± | 1.91 | 0.75 | 159.33 | ± | 29.77 | 2.37 | 15.33 | ± | 1.68 | 0.97 | 542.33 | ± | 84.11 | 1.05 |
| I255T | 41.73 | ± | 0.06 | 1.04 | 132.00 | ± | 11.53 | 1.97 | 15.17 | ± | 0.61 | 0.96 | 719.67 | ± | 40.02 | 1.39 |
| T256A | 76.97 | ± | 5.76 | 1.92 | 95.97 | ± | 7.87 | 1.43 | 29.50 | ± | 1.04 | 1.86 | 613.00 | ± | 47.63 | 1.19 |
| L257P | 35.07 | ± | 0.46 | 0.88 | 85.47 | ± | 1.53 | 1.27 | 21.47 | ± | 1.50 | 1.35 | 605.00 | ± | 82.16 | 1.17 |
| L257E | 26.10 | ± | 2.01 | 0.65 | 166.33 | ± | 8.50 | 2.48 | 19.93 | ± | 1.50 | 1.26 | 516.00 | ± | 26.66 | 1.00 |
| L257M | 56.83 | ± | 5.33 | 1.42 | 82.33 | ± | 0.85 | 1.23 | 14.90 | ± | 1.65 | 0.94 | 557.67 | ± | 18.90 | 1.08 |
| D259G | 52.57 | ± | 1.60 | 1.31 | 60.47 | ± | 2.70 | 0.90 | 21.03 | ± | 0.60 | 1.33 | 661.33 | ± | 31.63 | 1.28 |
| G266R | 53.00 | ± | 1.87 | 1.33 | 109.33 | ± | 9.29 | 1.63 | 11.30 | ± | 0.80 | 0.71 | 700.00 | ± | 21.17 | 1.35 |
| R267Q | 58.43 | ± | 3.01 | 1.46 | 56.57 | ± | 2.31 | 0.84 | 19.00 | ± | 0.36 | 1.20 | 615.33 | ± | 15.01 | 1.19 |
| S269G | 32.37 | ± | 0.61 | 0.81 | 112.67 | ± | 4.04 | 1.68 | 13.20 | ± | 0.20 | 0.83 | 725.33 | ± | 8.62 | 1.40 |
| S269N | 34.33 | ± | 1.00 | 0.86 | 81.67 | ± | 5.88 | 1.22 | 18.00 | ± | 1.41 | 1.13 | 280.33 | ± | 65.74 | 0.54 |
| F270L | 48.93 | ± | 0.31 | 1.22 | 65.10 | ± | 1.55 | 0.97 | 13.87 | ± | 1.07 | 0.87 | 567.67 | ± | 2.31 | 1.10 |
| E271K | 41.27 | ± | 1.31 | 1.03 | 96.10 | ± | 7.05 | 1.43 | 13.70 | ± | 1.21 | 0.86 | 575.00 | ± | 36.43 | 1.11 |
| H273C | 35.23 | ± | 1.53 | 0.88 | 166.67 | ± | 2.08 | 2.48 | 21.40 | ± | 0.75 | 1.35 | 461.00 | ± | 3.61 | 0.89 |
| V274I | 82.00 | ± | 0.62 | 2.05 | 151.33 | ± | 17.79 | 2.25 | 19.80 | ± | 0.44 | 1.25 | 607.33 | ± | 20.31 | 1.18 |
| A276V | 74.80 | ± | 7.97 | 1.87 | 81.77 | ± | 3.88 | 1.22 | 16.70 | ± | 2.14 | 1.05 | 586.67 | ± | 55.51 | 1.14 |
| R280T | 39.17 | ± | 0.49 | 0.98 | 116.00 | ± | 4.58 | 1.73 | 15.27 | ± | 1.27 | 0.96 | 627.33 | ± | 18.04 | 1.21 |
| R280L | 22.43 | ± | 1.81 | 0.56 | 153.33 | ± | 2.89 | 2.28 | 12.43 | ± | 0.97 | 0.78 | 797.67 | ± | 13.01 | 1.54 |
| R282Q | 75.67 | ± | 4.91 | 1.89 | 85.43 | ± | 5.11 | 1.27 | 19.13 | ± | 1.10 | 1.21 | 415.67 | ± | 21.36 | 0.80 |
| P295S | 69.70 | ± | 6.94 | 1.74 | 58.13 | ± | 2.31 | 0.87 | 19.73 | ± | 3.10 | 1.24 | 433.33 | ± | 22.81 | 0.84 |
| H297R | 31.30 | ± | 1.06 | 0.78 | 97.40 | ± | 0.87 | 1.45 | 9.59 | ± | 1.57 | 0.60 | 712.33 | ± | 8.33 | 1.38 |
| P300S | 49.50 | ± | 1.91 | 1.24 | 121.33 | ± | 17.47 | 1.81 | 8.34 | ± | 0.58 | 0.53 | 202.67 | ± | 66.98 | 0.39 |
| P305R | 22.60 | ± | 1.68 | 0.57 | 73.63 | ± | 1.91 | 1.10 | 12.80 | ± | 1.80 | 0.81 | 757.00 | ± | 20.07 | 1.47 |
| R306* | 24.00 | ± | 0.95 | 0.60 | 79.90 | ± | 1.93 | 1.19 | 15.90 | ± | 0.46 | 1.00 | 815.67 | ± | 48.76 | 1.58 |
| P316S | 25.40 | ± | 2.07 | 0.64 | 70.43 | ± | 2.32 | 1.05 | 9.84 | ± | 0.16 | 0.62 | 648.67 | ± | 137.35 | 1.26 |
| Q317H | 67.27 | ± | 4.02 | 1.68 | 83.40 | ± | 1.25 | 1.24 | 13.37 | ± | 0.81 | 0.84 | 948.33 | ± | 44.88 | 1.84 |
| P318S | 14.37 | ± | 2.10 | 0.36 | 71.43 | ± | 4.48 | 1.06 | 14.37 | ± | 1.06 | 0.91 | 681.67 | ± | 60.17 | 1.32 |
| K321E | 20.70 | ± | 2.84 | 0.52 | 71.97 | ± | 3.41 | 1.07 | 14.30 | ± | 0.61 | 0.90 | 698.00 | ± | 40.04 | 1.35 |
| D324N | 22.47 | ± | 2.63 | 0.56 | 77.60 | ± | 1.04 | 1.16 | 14.53 | ± | 3.96 | 0.92 | 719.33 | ± | 33.25 | 1.39 |
| R333H | 20.97 | ± | 2.47 | 0.52 | 78.17 | ± | 2.62 | 1.16 | 15.07 | ± | 2.84 | 0.95 | 786.00 | ± | 1.73 | 1.52 |
| R337S | 21.83 | ± | 3.40 | 0.55 | 74.83 | ± | 4.18 | 1.11 | 13.57 | ± | 1.22 | 0.86 | 860.33 | ± | 64.58 | 1.67 |
| M340T | 24.27 | ± | 2.61 | 0.61 | 78.60 | ± | 1.73 | 1.17 | 16.97 | ± | 2.73 | 1.07 | 608.00 | ± | 39.61 | 1.18 |
| R342* | 20.80 | ± | 2.07 | 0.52 | 77.97 | ± | 3.70 | 1.16 | 15.53 | ± | 0.64 | 0.98 | 902.33 | ± | 86.50 | 1.75 |
| R342Q | 84.70 | ± | 3.27 | 2.12 | 158.33 | ± | 3.21 | 2.36 | 17.80 | ± | 2.33 | 1.12 | >1000 | ± | |  |
| N345D | 21.10 | ± | 2.72 | 0.53 | 73.57 | ± | 4.07 | 1.10 | 15.00 | ± | 3.20 | 0.95 | 823.33 | ± | 155.05 | 1.59 |
| G360R | 29.53 | ± | 1.75 | 0.74 | 78.93 | ± | 1.72 | 1.18 | 16.00 | ± | 0.50 | 1.01 | 870.00 | ± | 23.26 | 1.68 |
| S362G | 23.43 | ± | 5.63 | 0.59 | 76.50 | ± | 4.61 | 1.14 | 18.73 | ± | 1.90 | 1.18 | 875.00 | ± | 124.69 | 1.69 |
| H365Y | 30.03 | ± | 2.37 | 0.75 | 79.47 | ± | 1.75 | 1.18 | 14.47 | ± | 2.34 | 0.91 | 958.00 | ± | 41.33 | 1.85 |
| L369fs | 23.43 | ± | 0.23 | 0.59 | 75.77 | ± | 1.79 | 1.13 | 16.40 | ± | 2.19 | 1.03 | 973.00 | ± | 22.11 | 1.88 |
| Q375* | 19.60 | ± | 2.96 | 0.49 | 79.57 | ± | 1.22 | 1.19 | 15.80 | ± | 0.17 | 1.00 | 510.33 | ± | 66.02 | 0.99 |

RF: resistant factor; RF= IC50 of WT or mutant / IC50 of control; Leflunomide (LEF); Hydroxychloroquine (HCQ); Cyclosporine A (CSA); Tacrolimus (FK506)

## Original western blot for three repeats

**
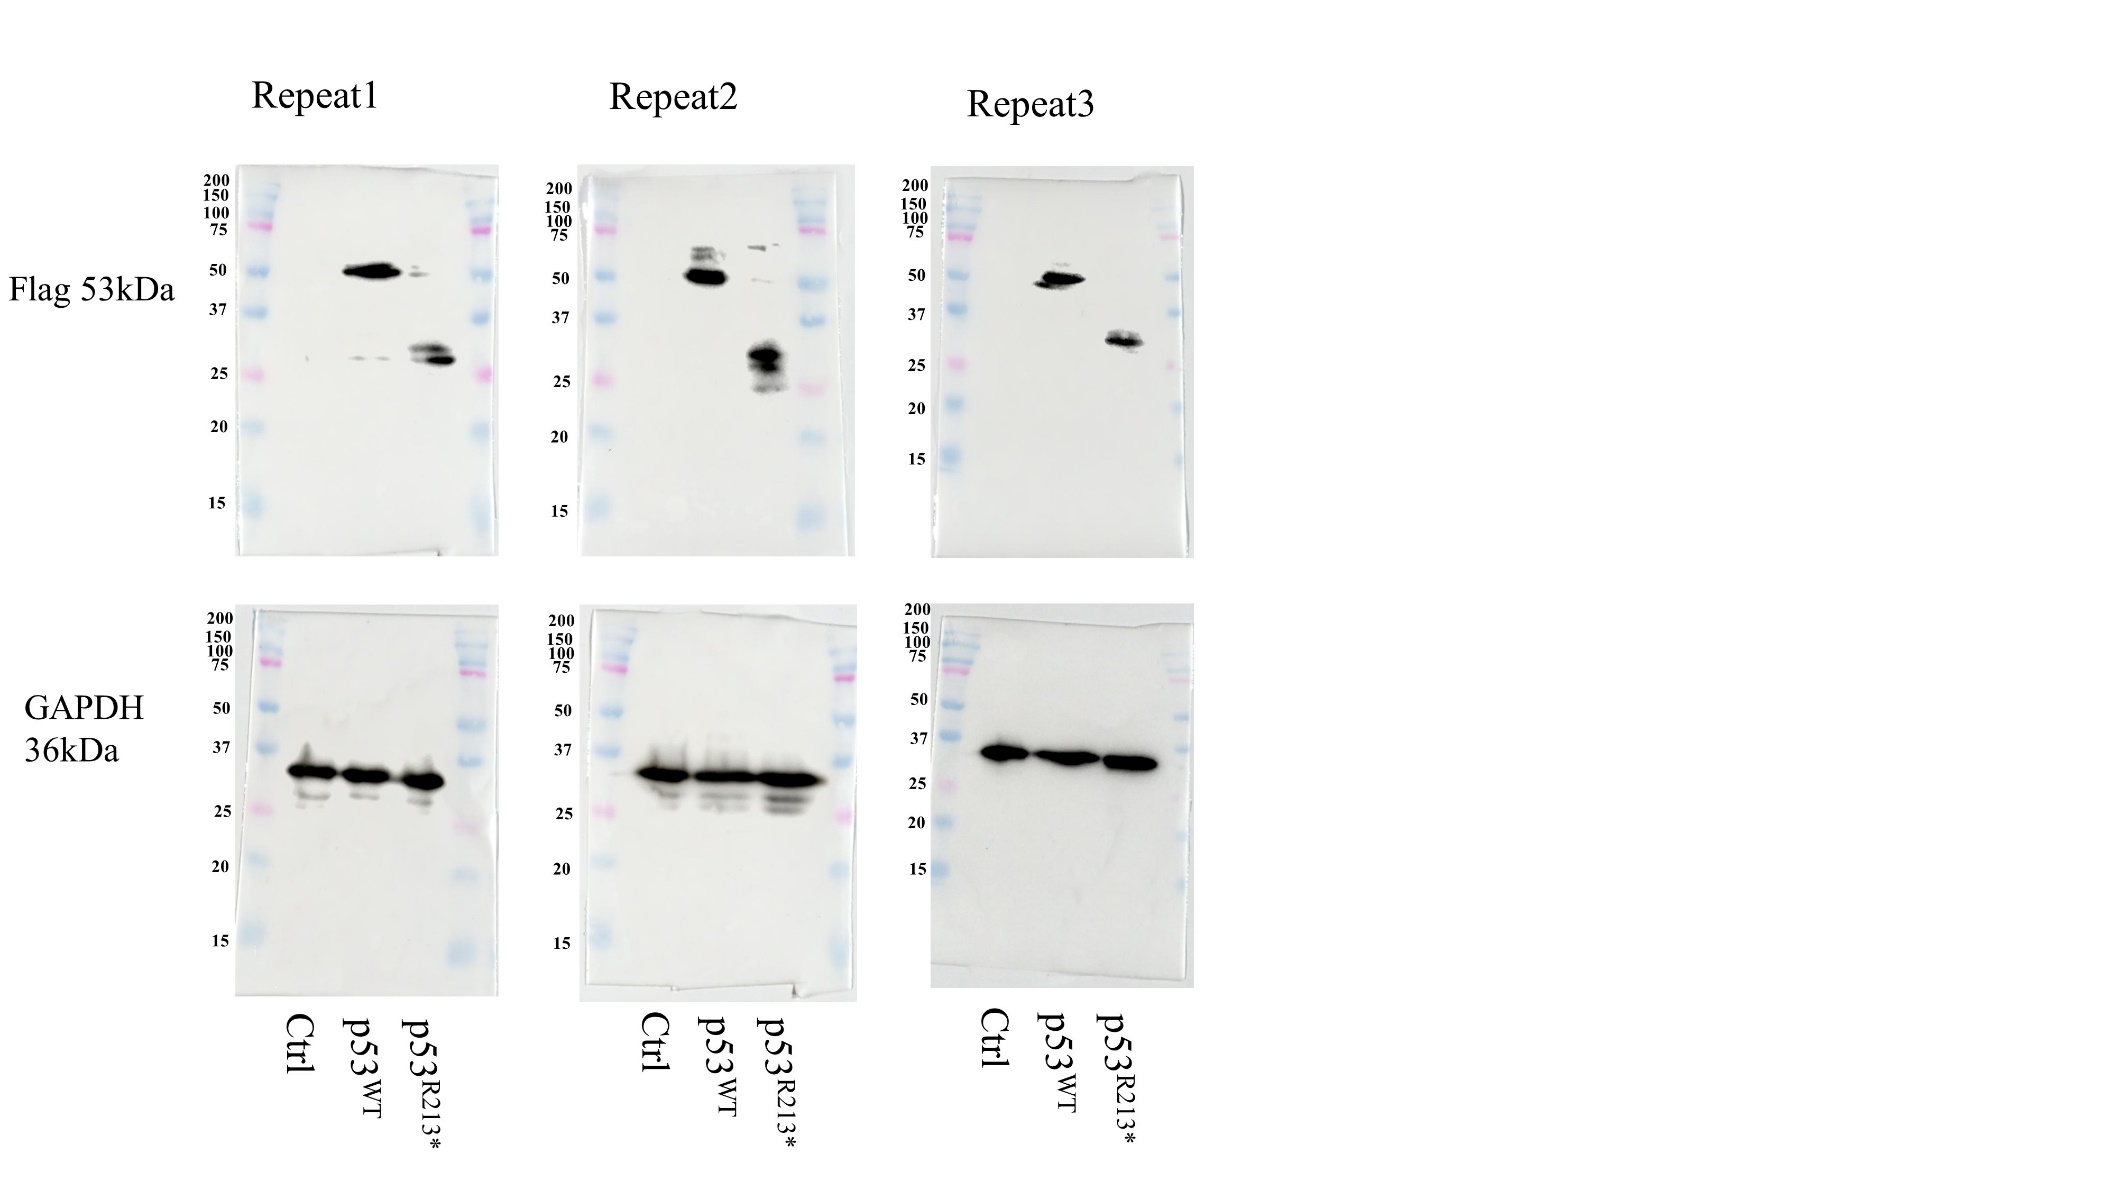

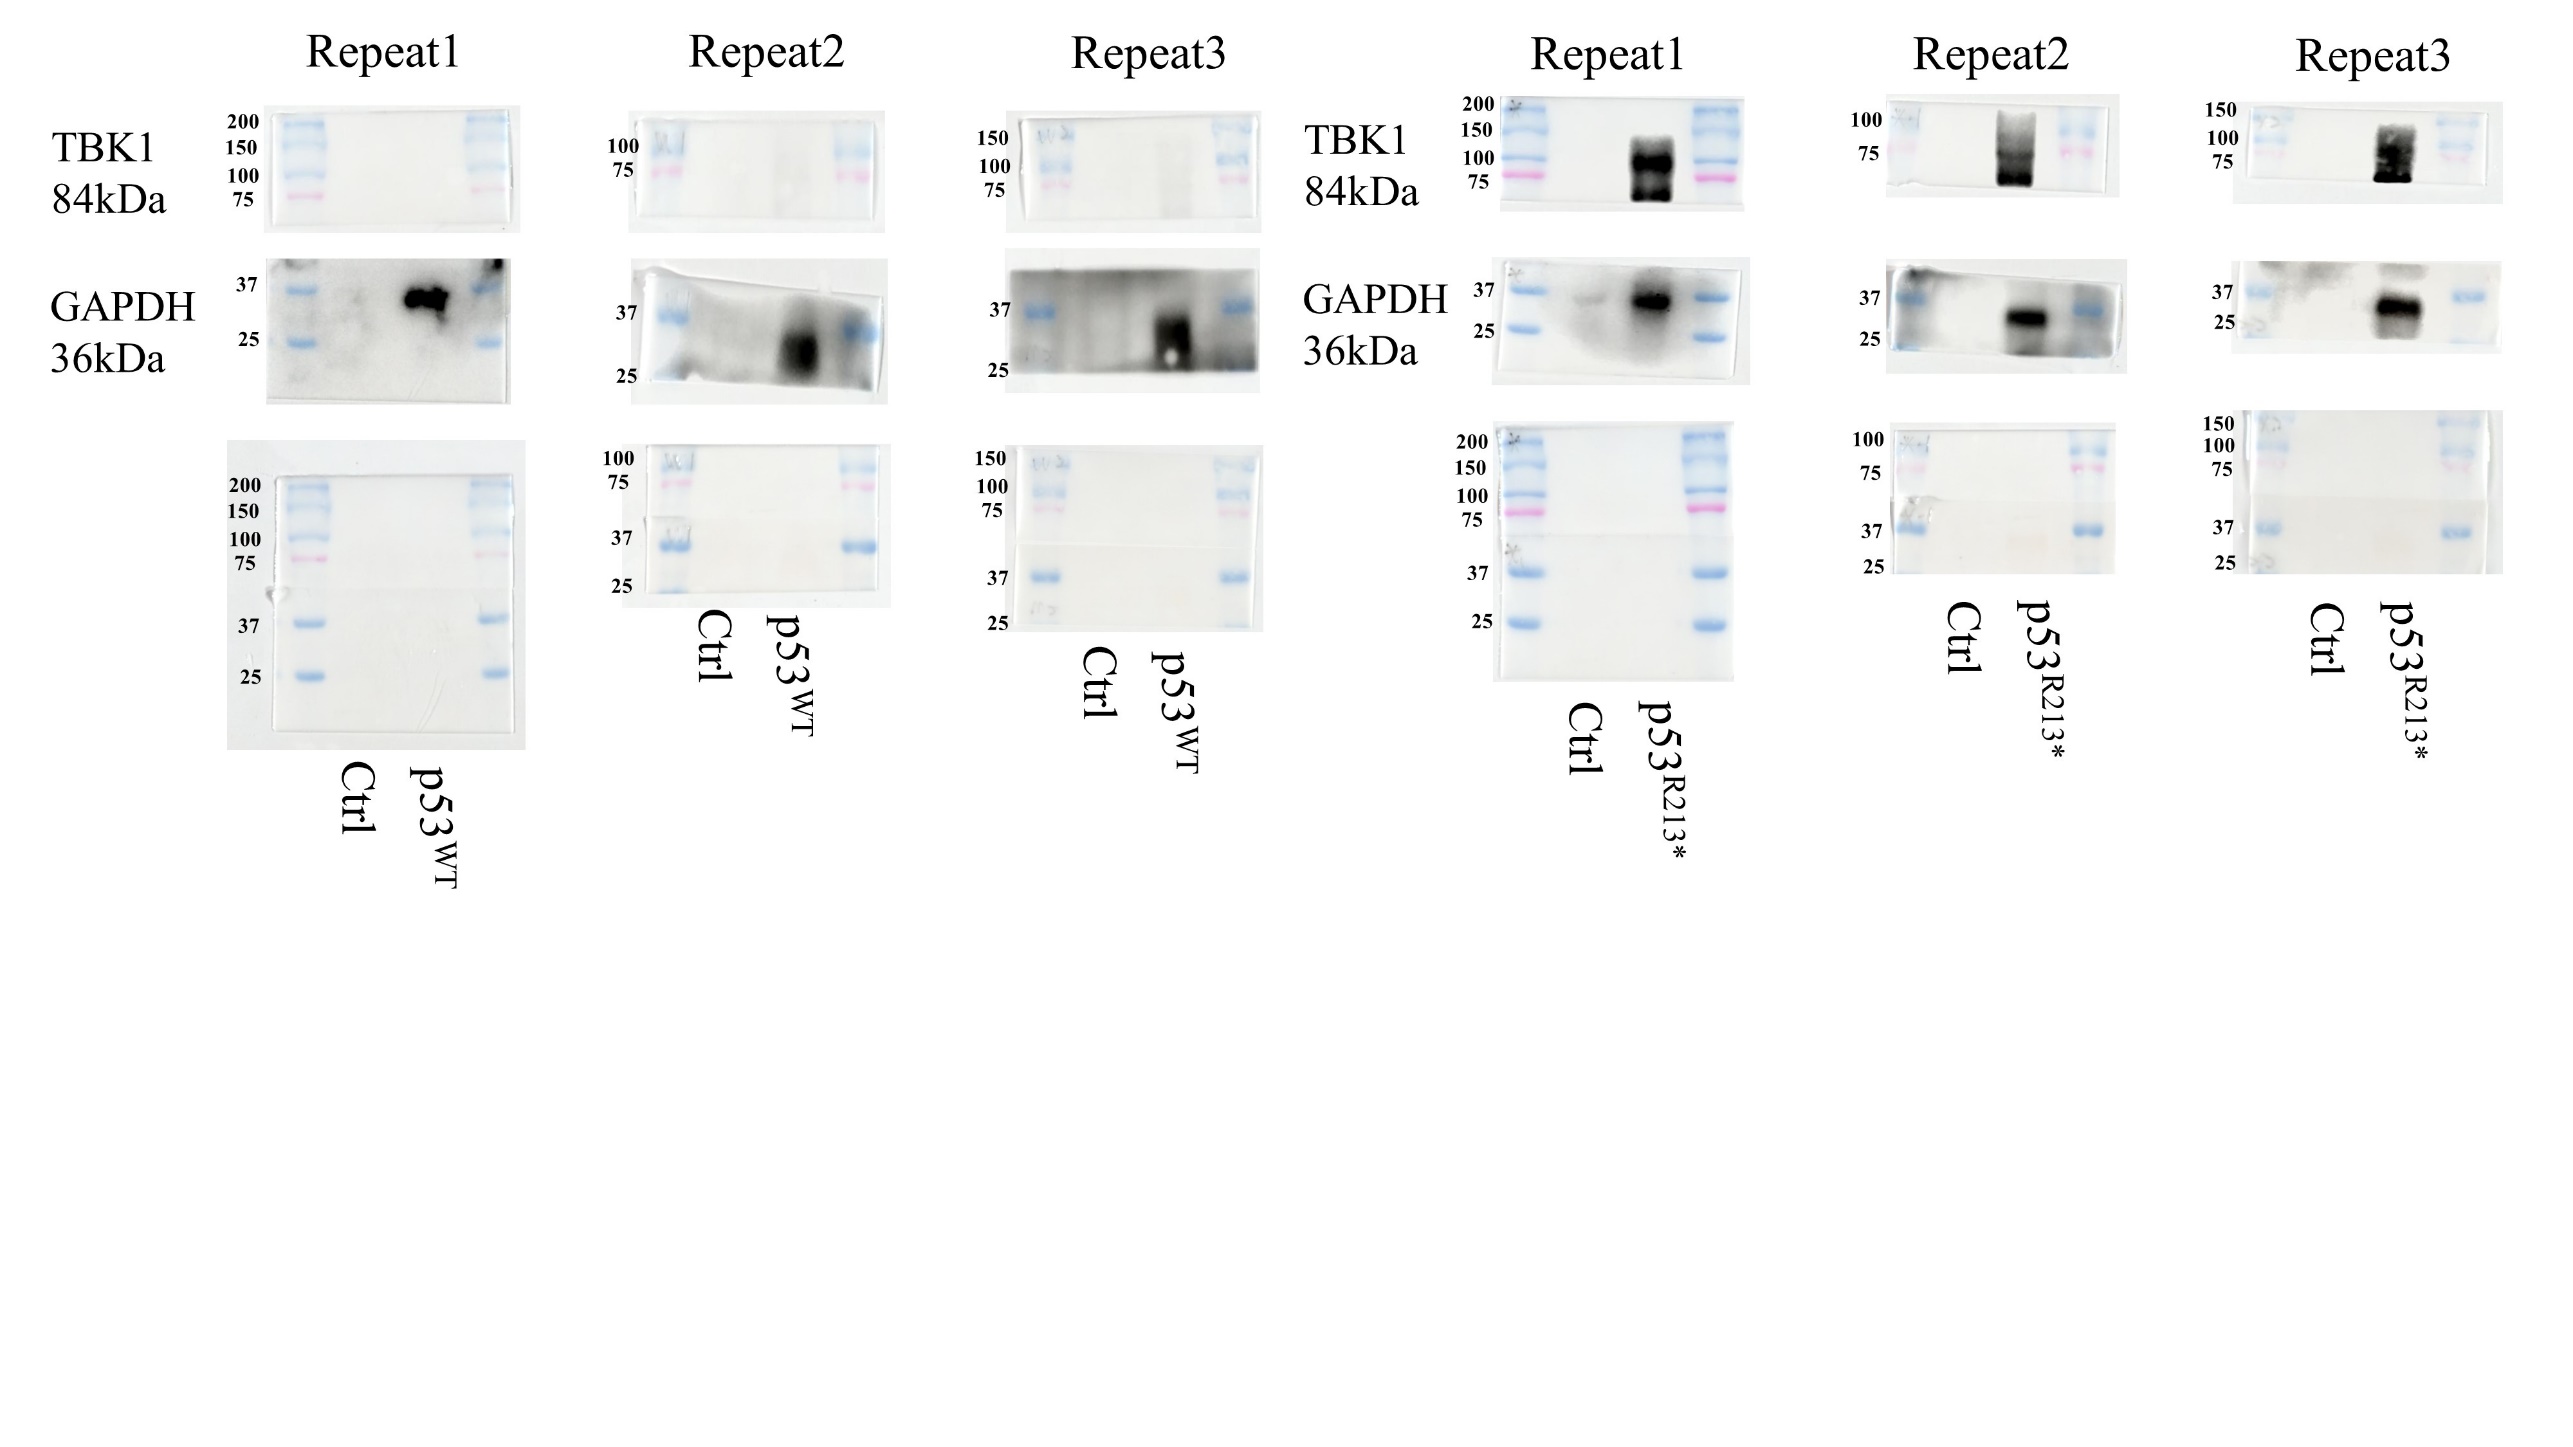

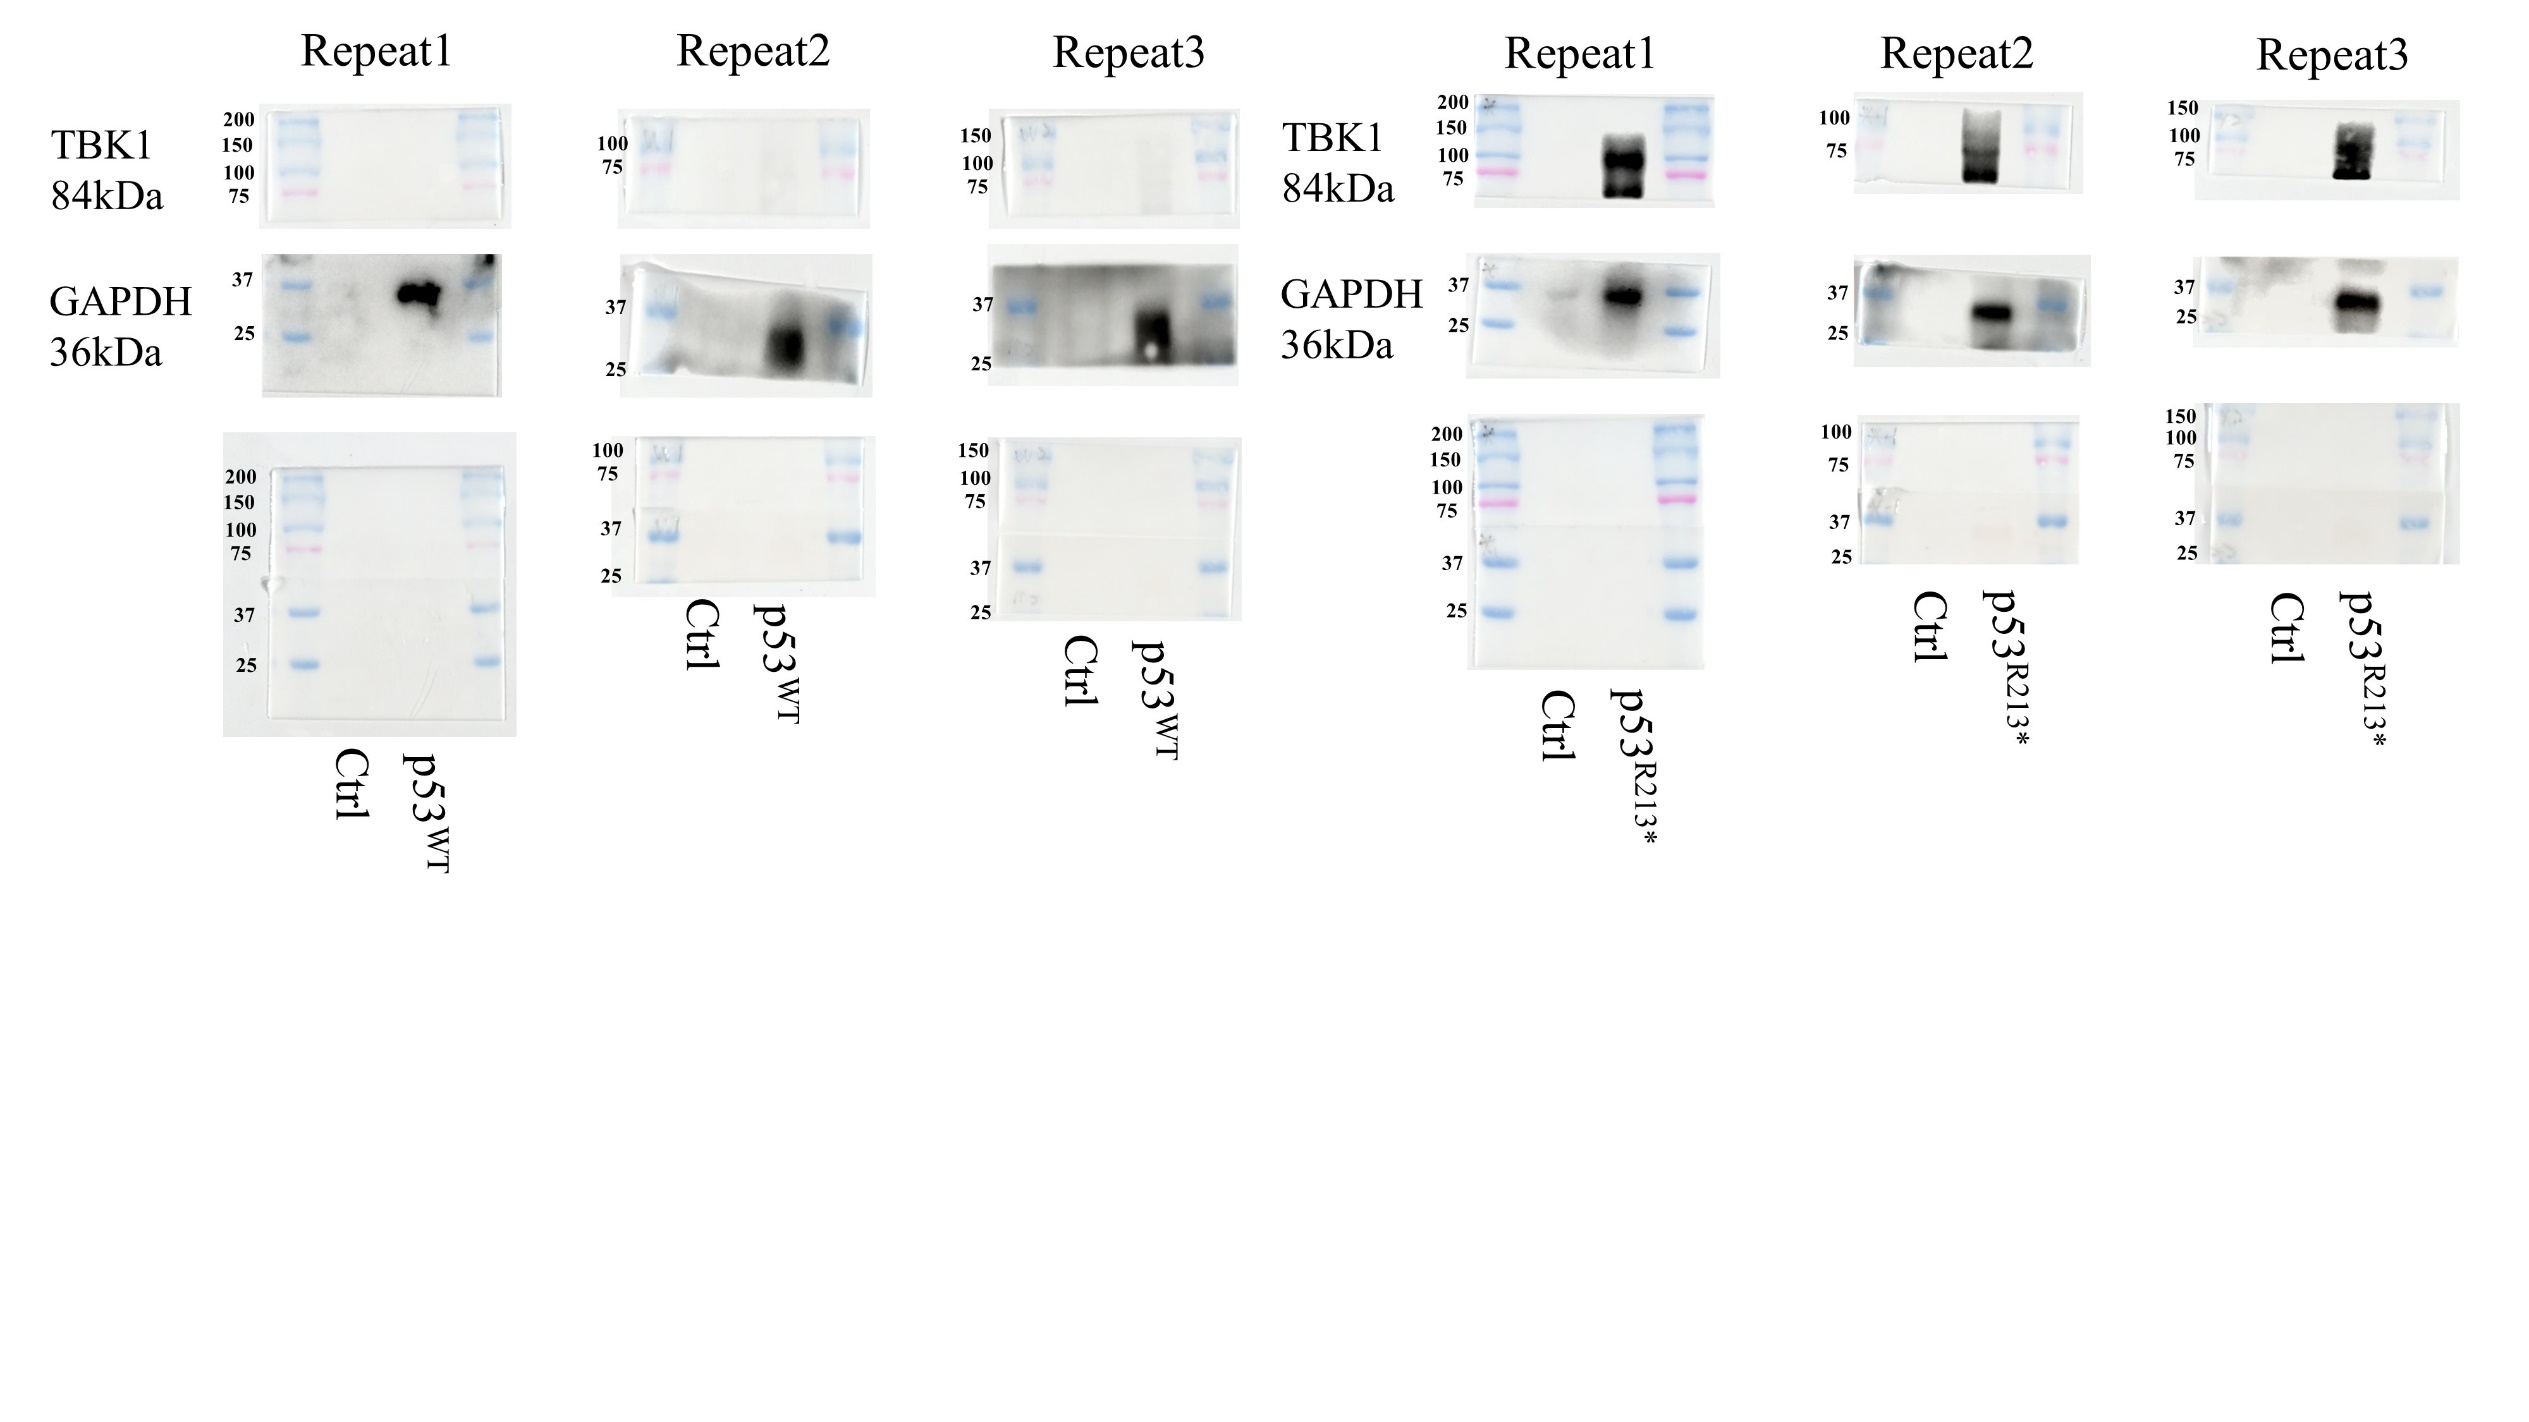

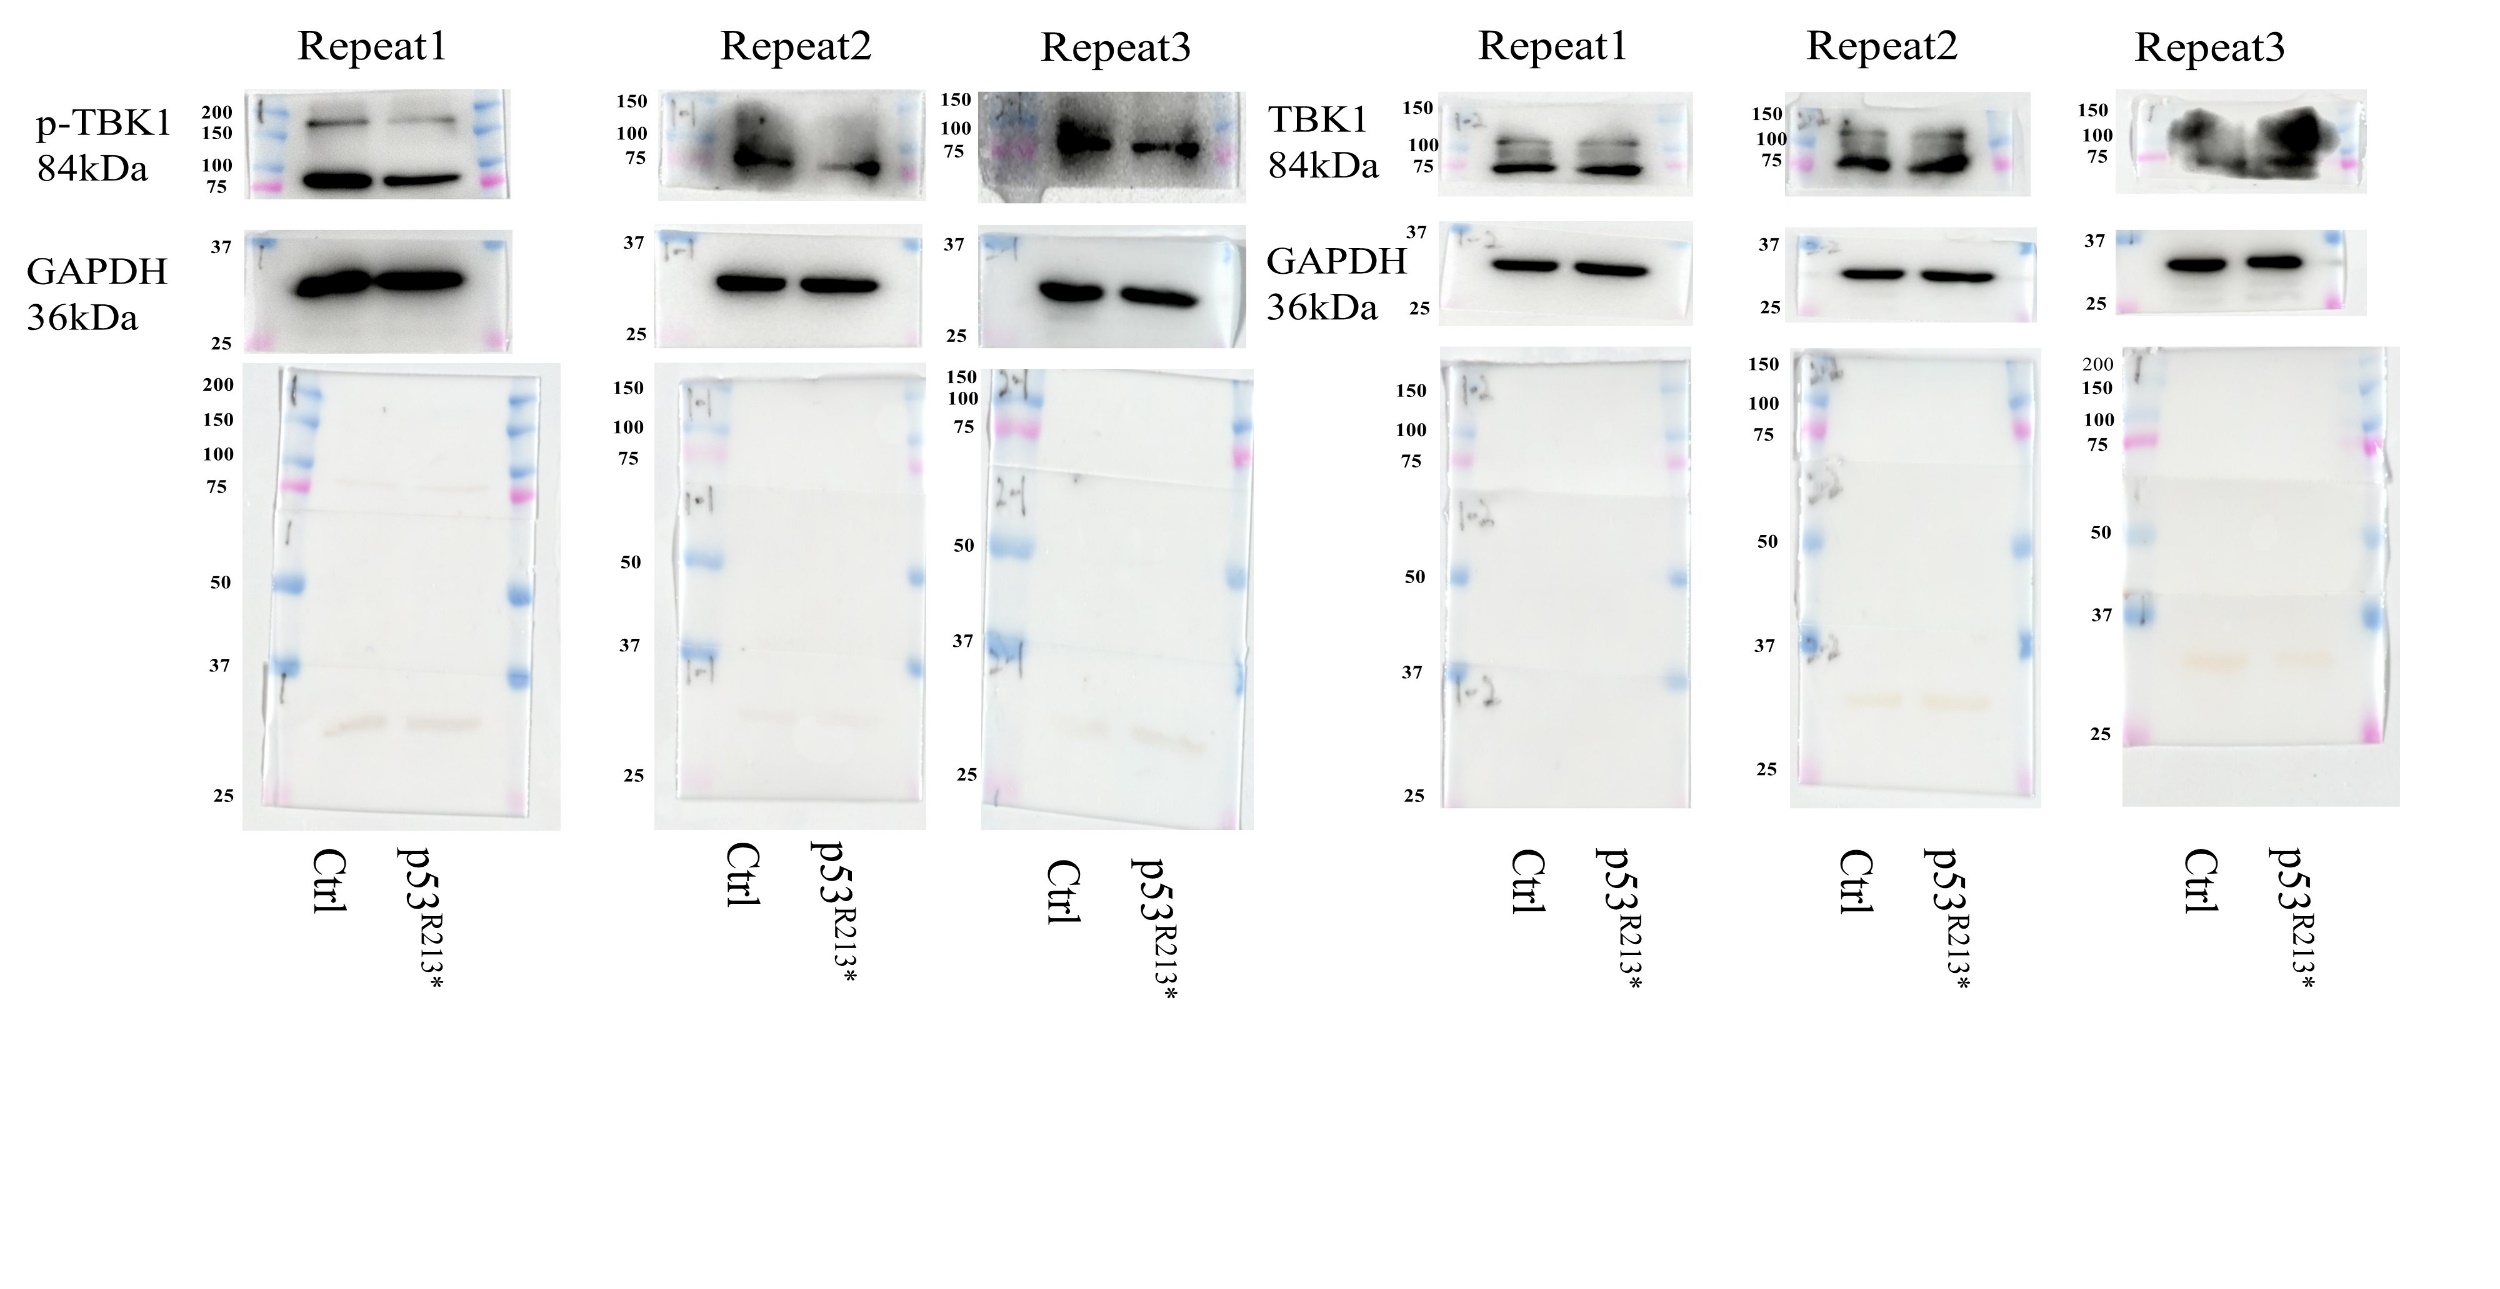

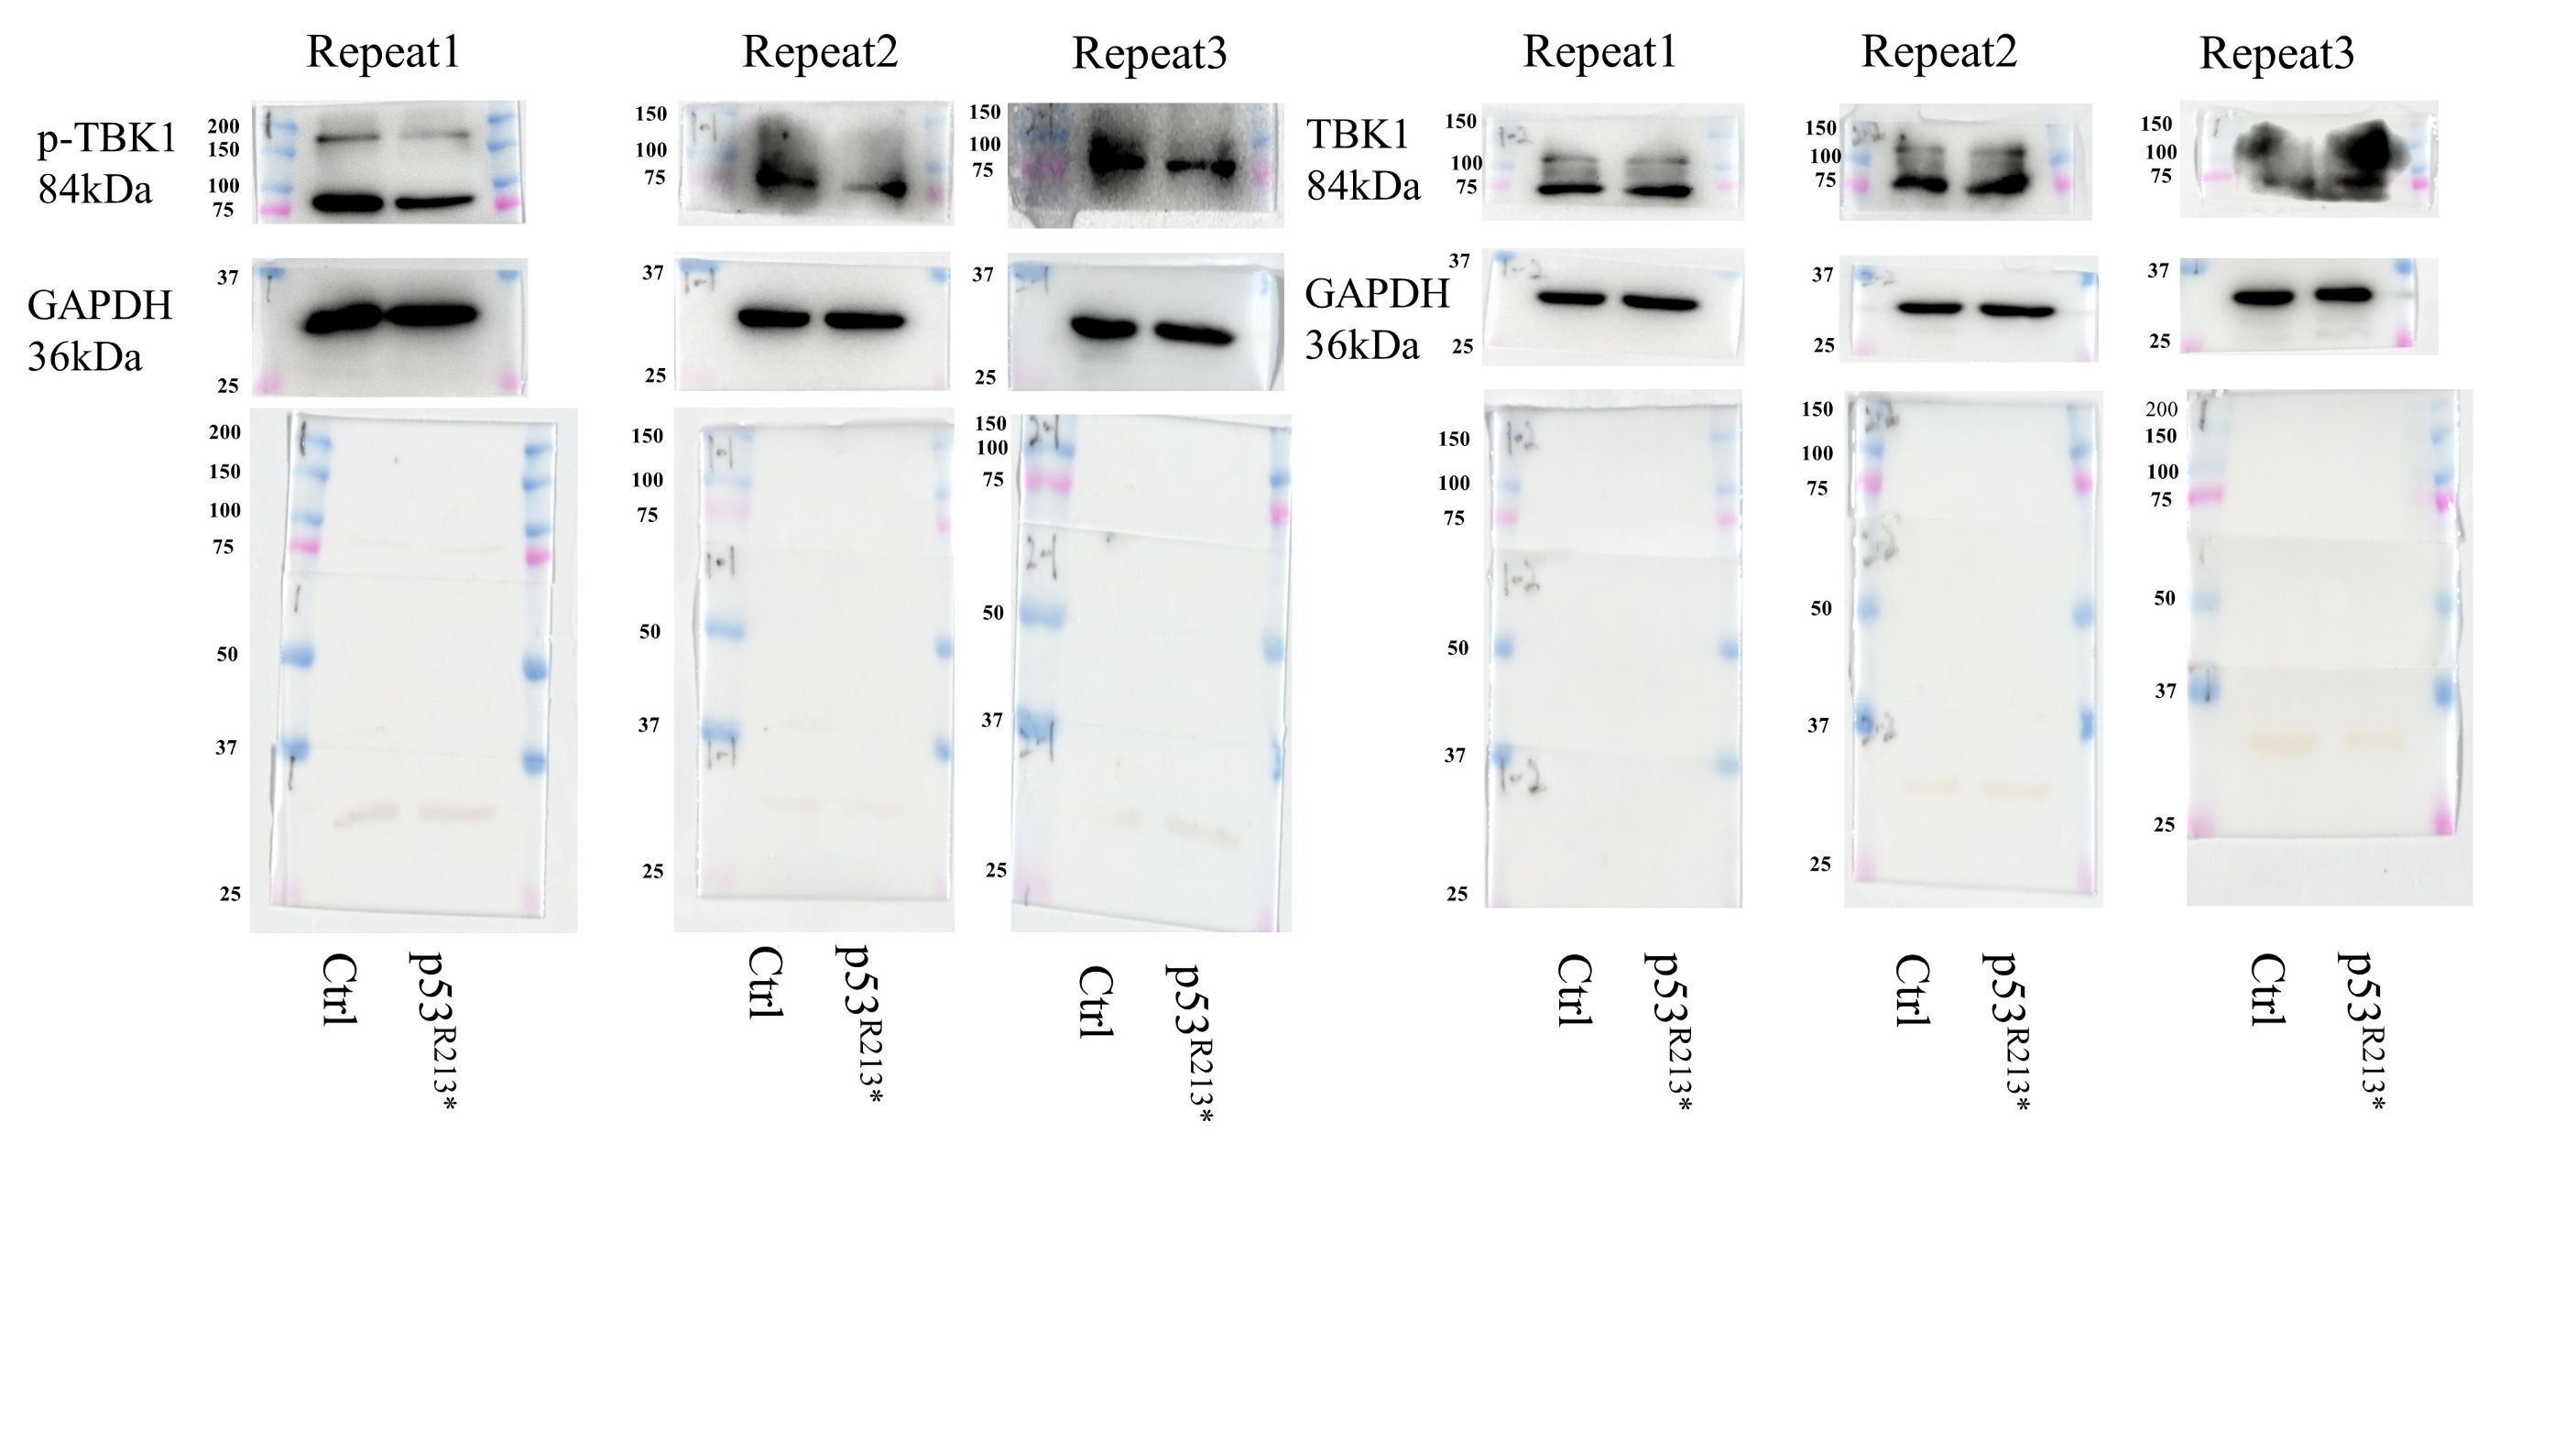

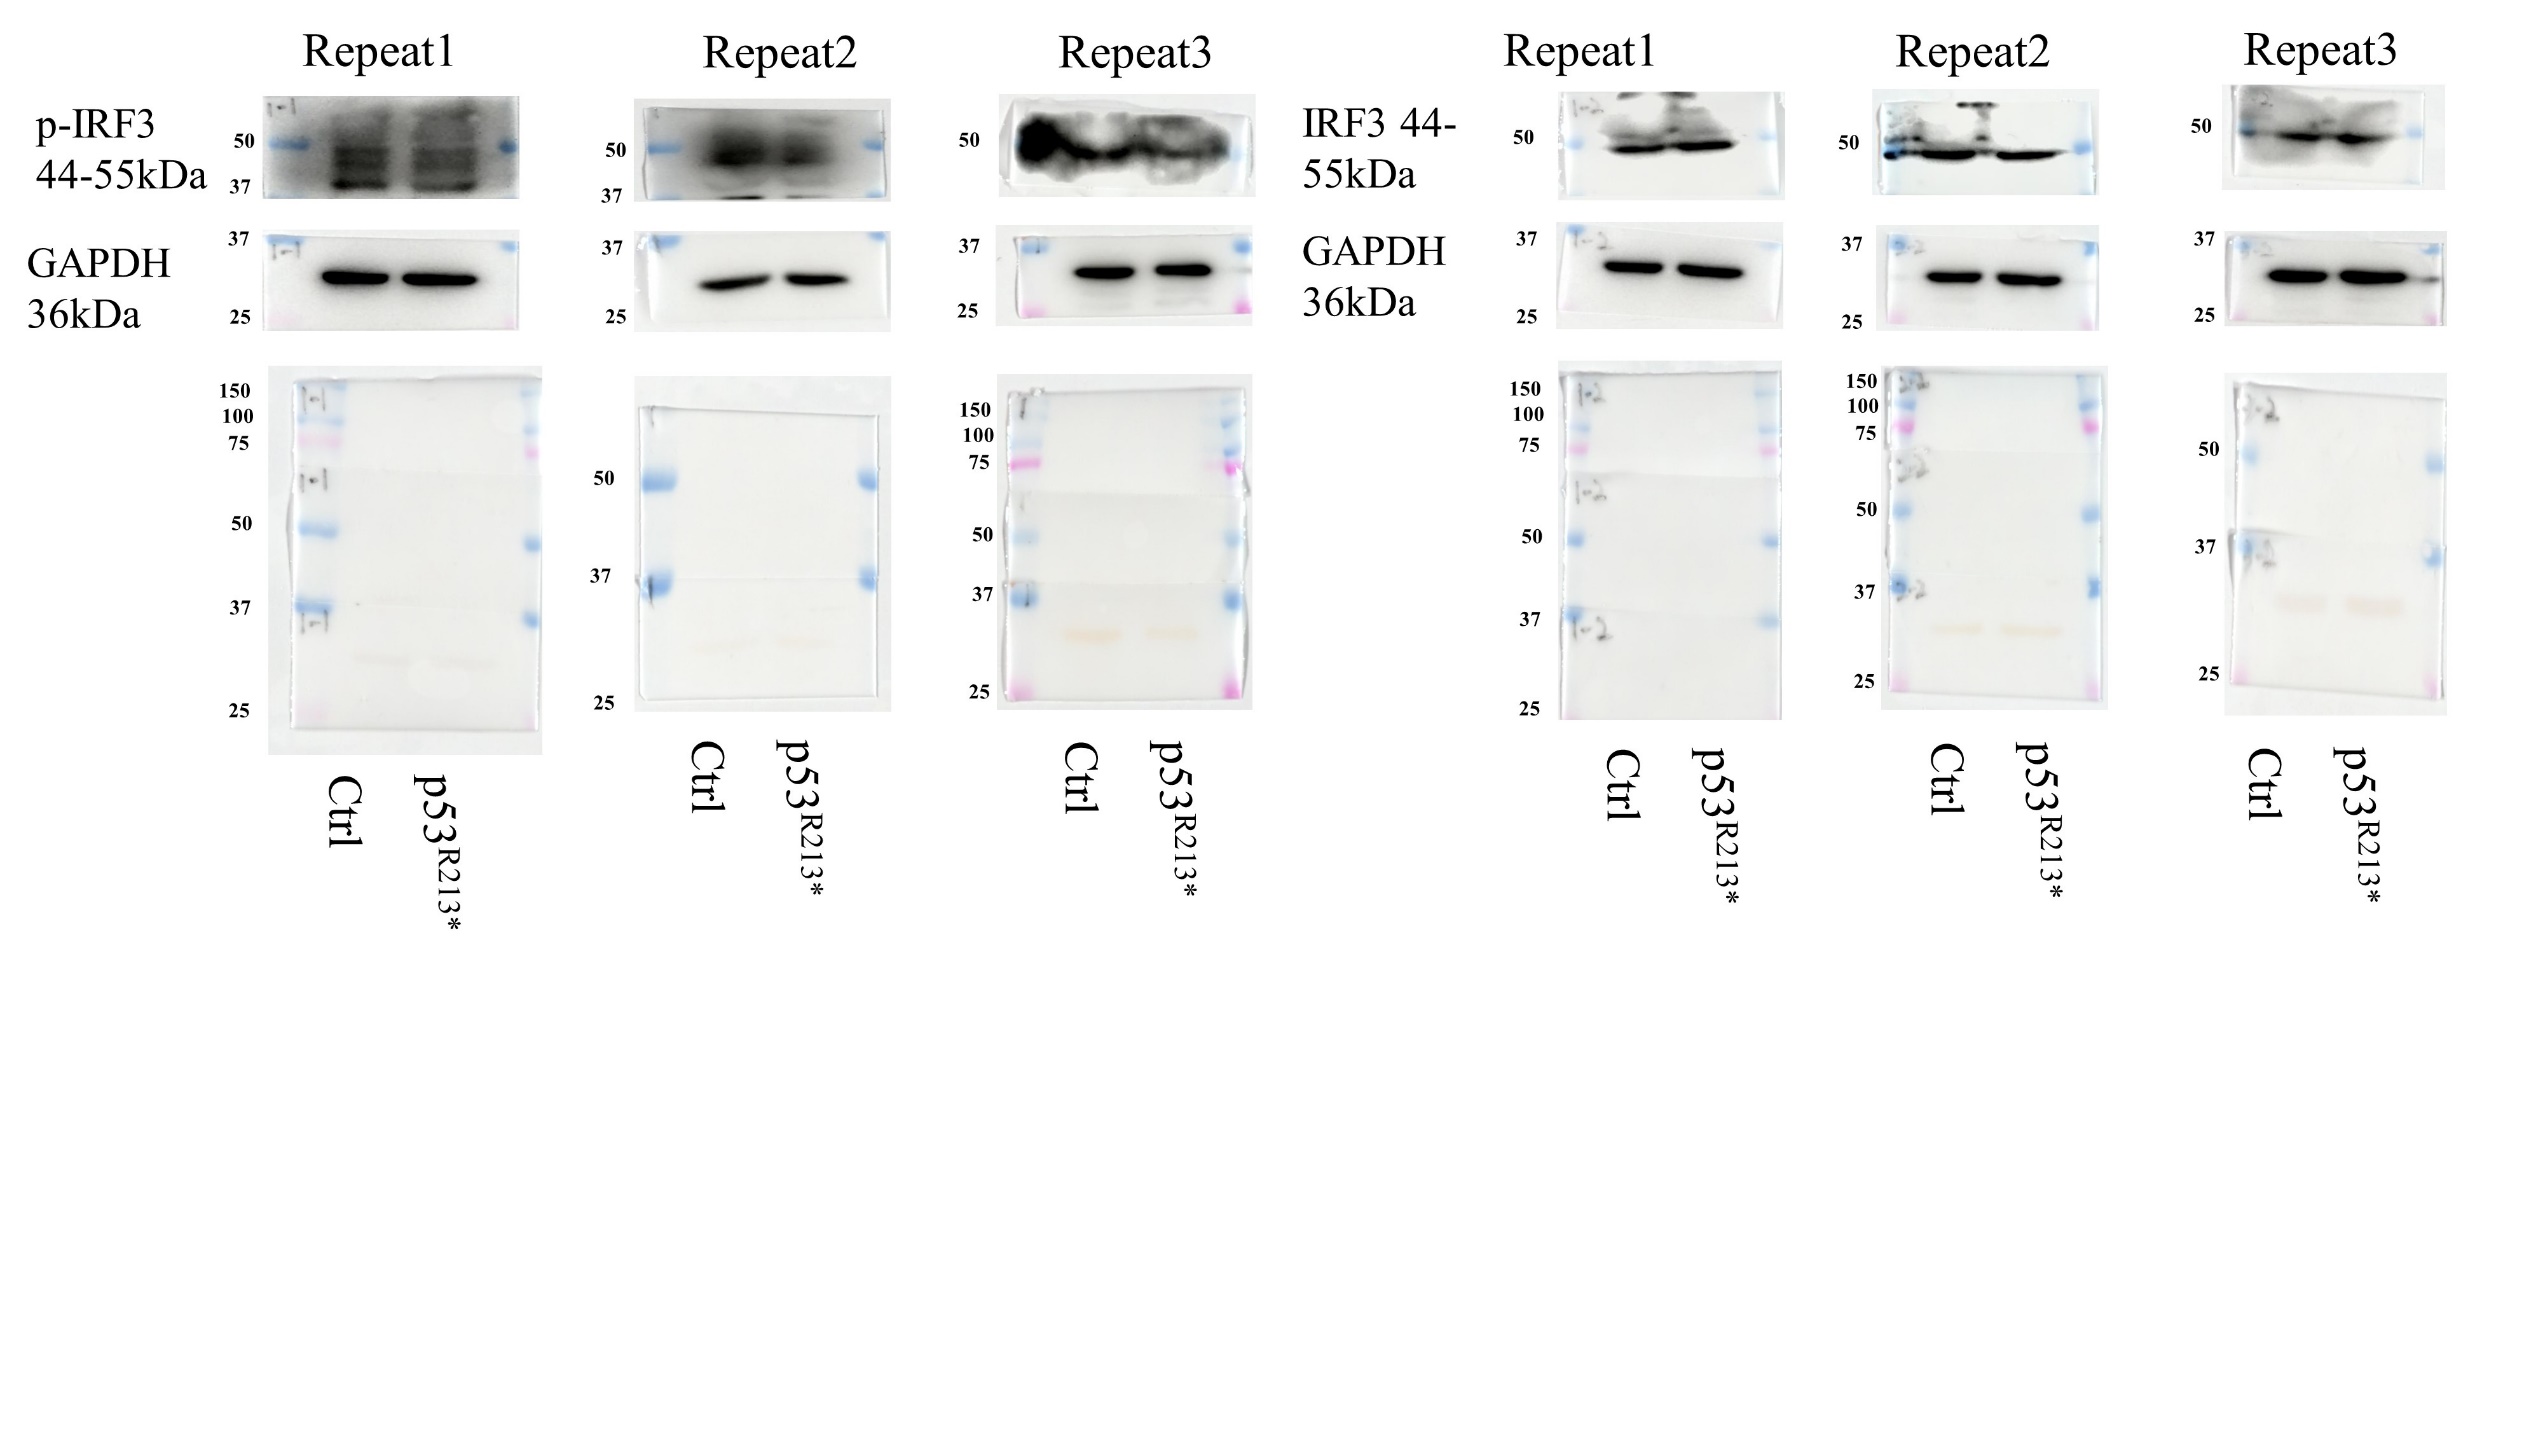

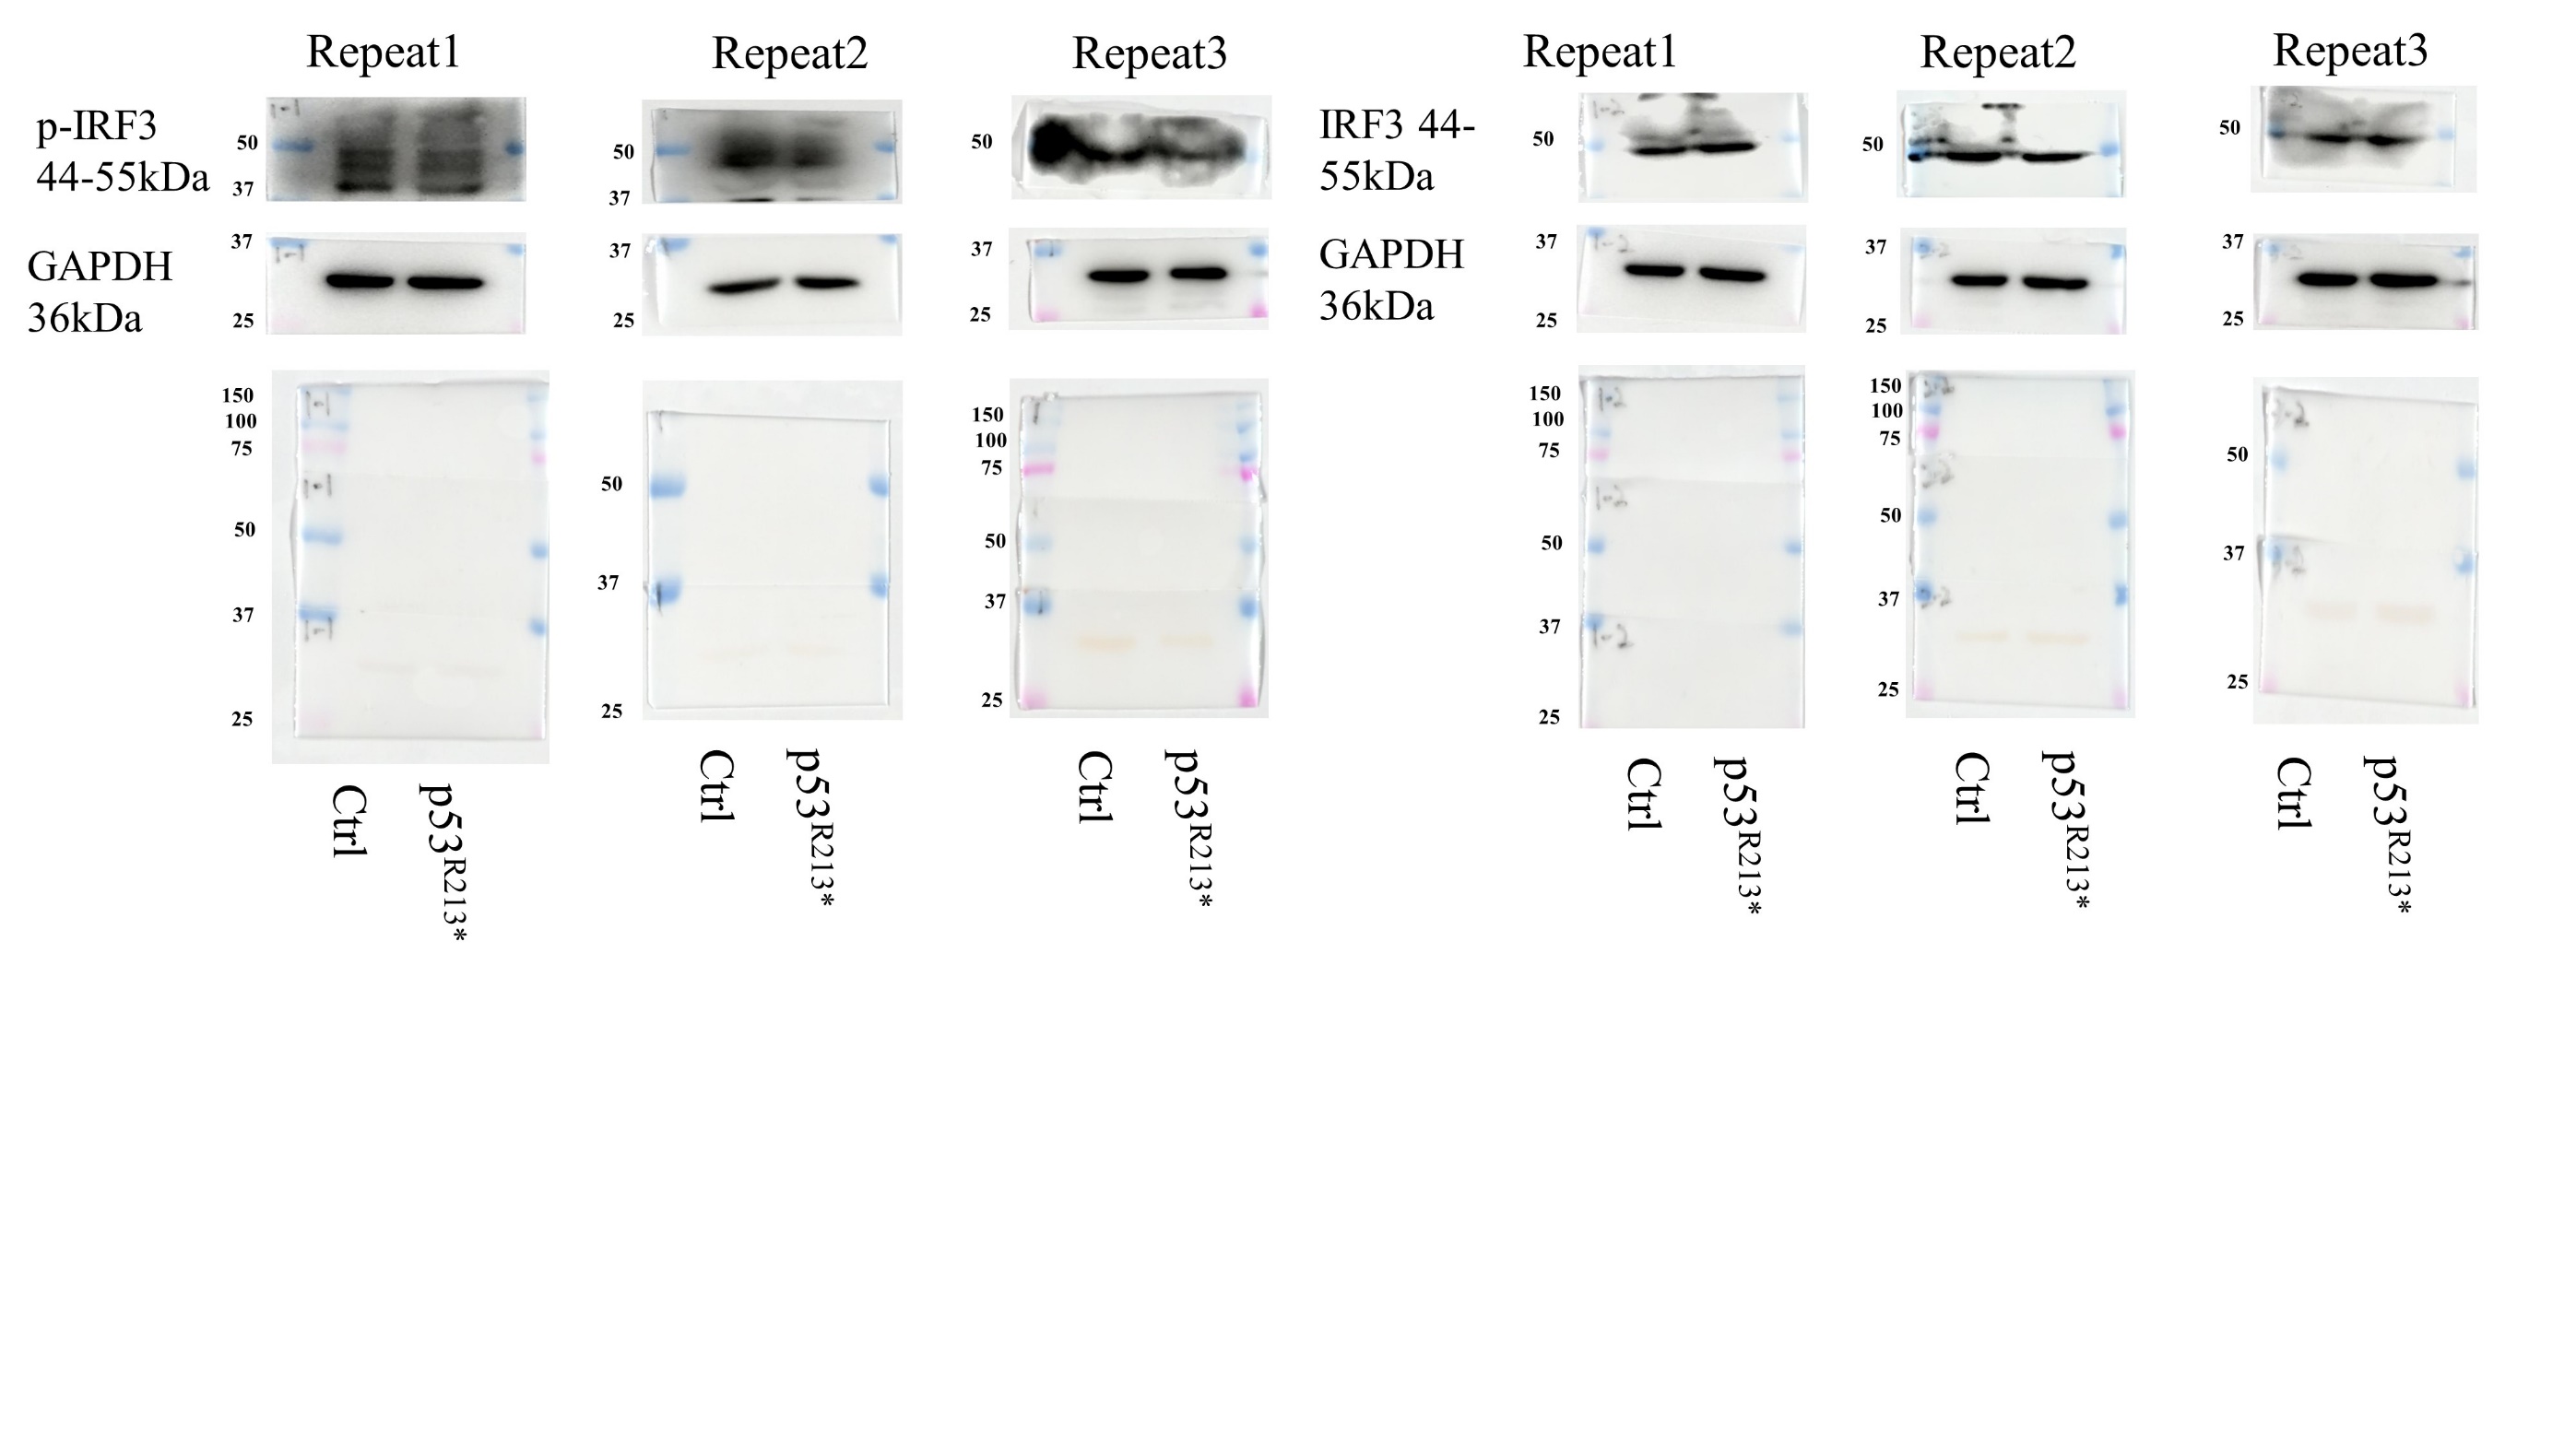
**

**
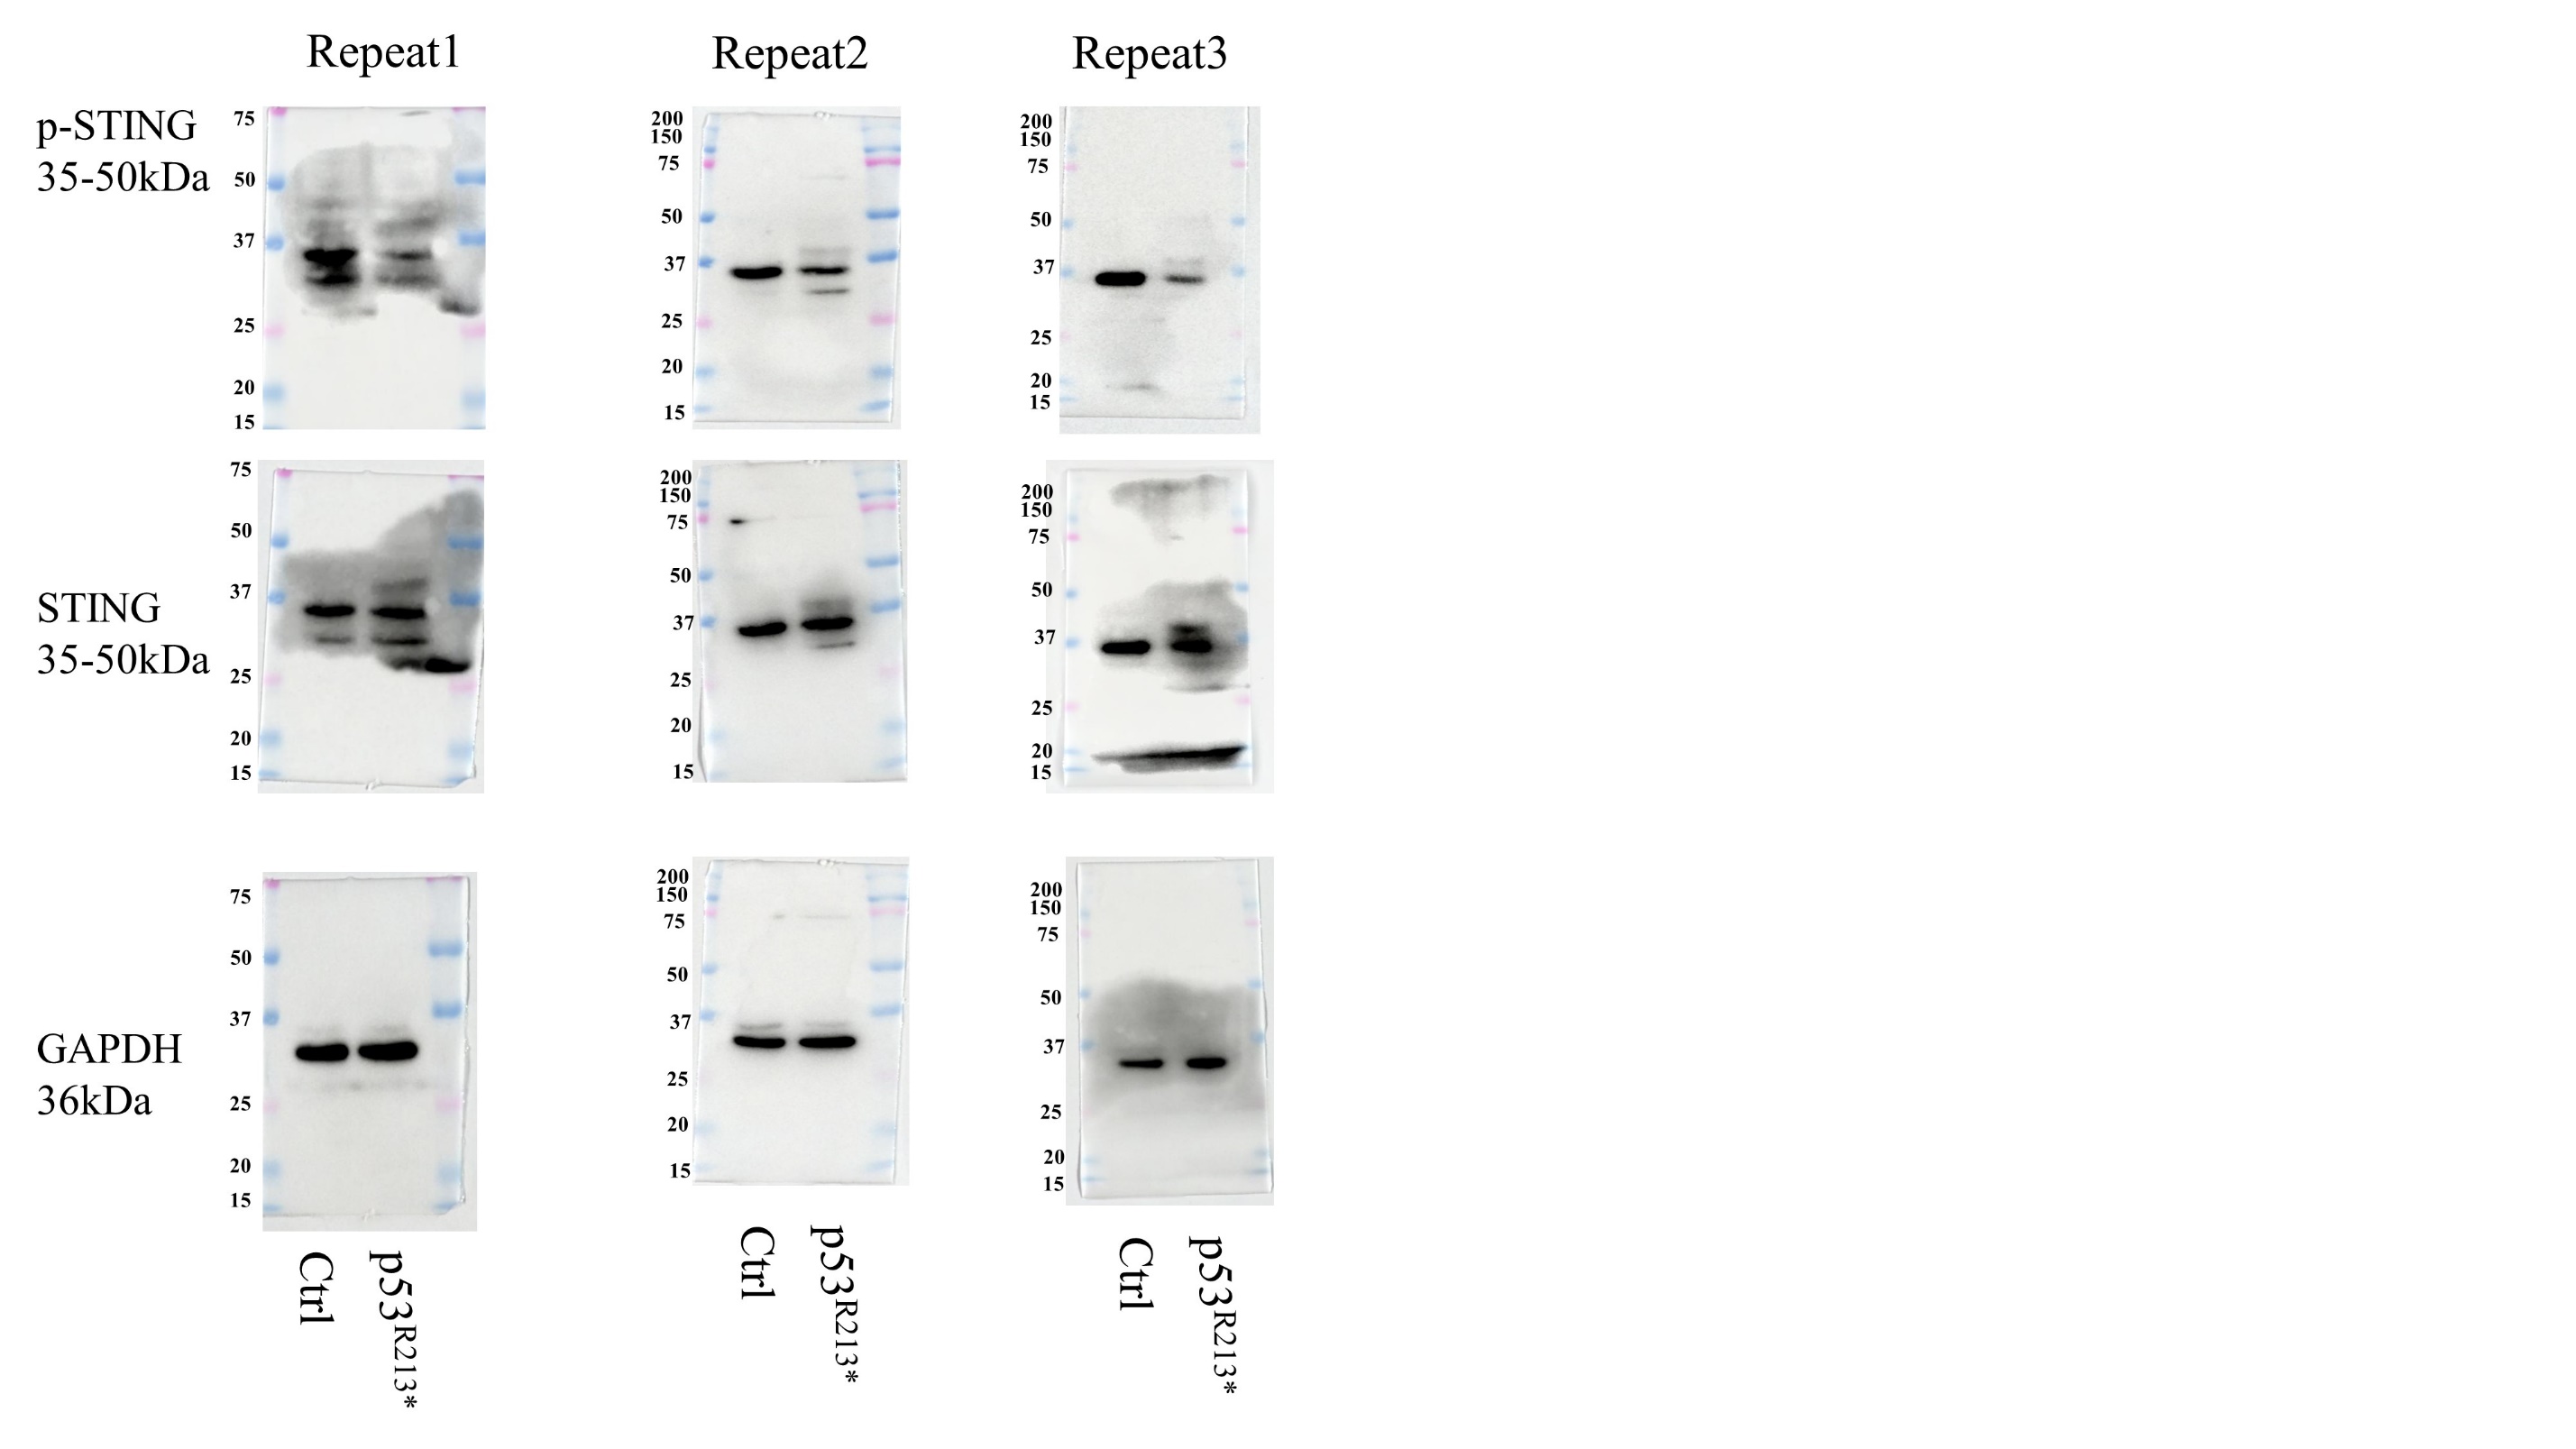

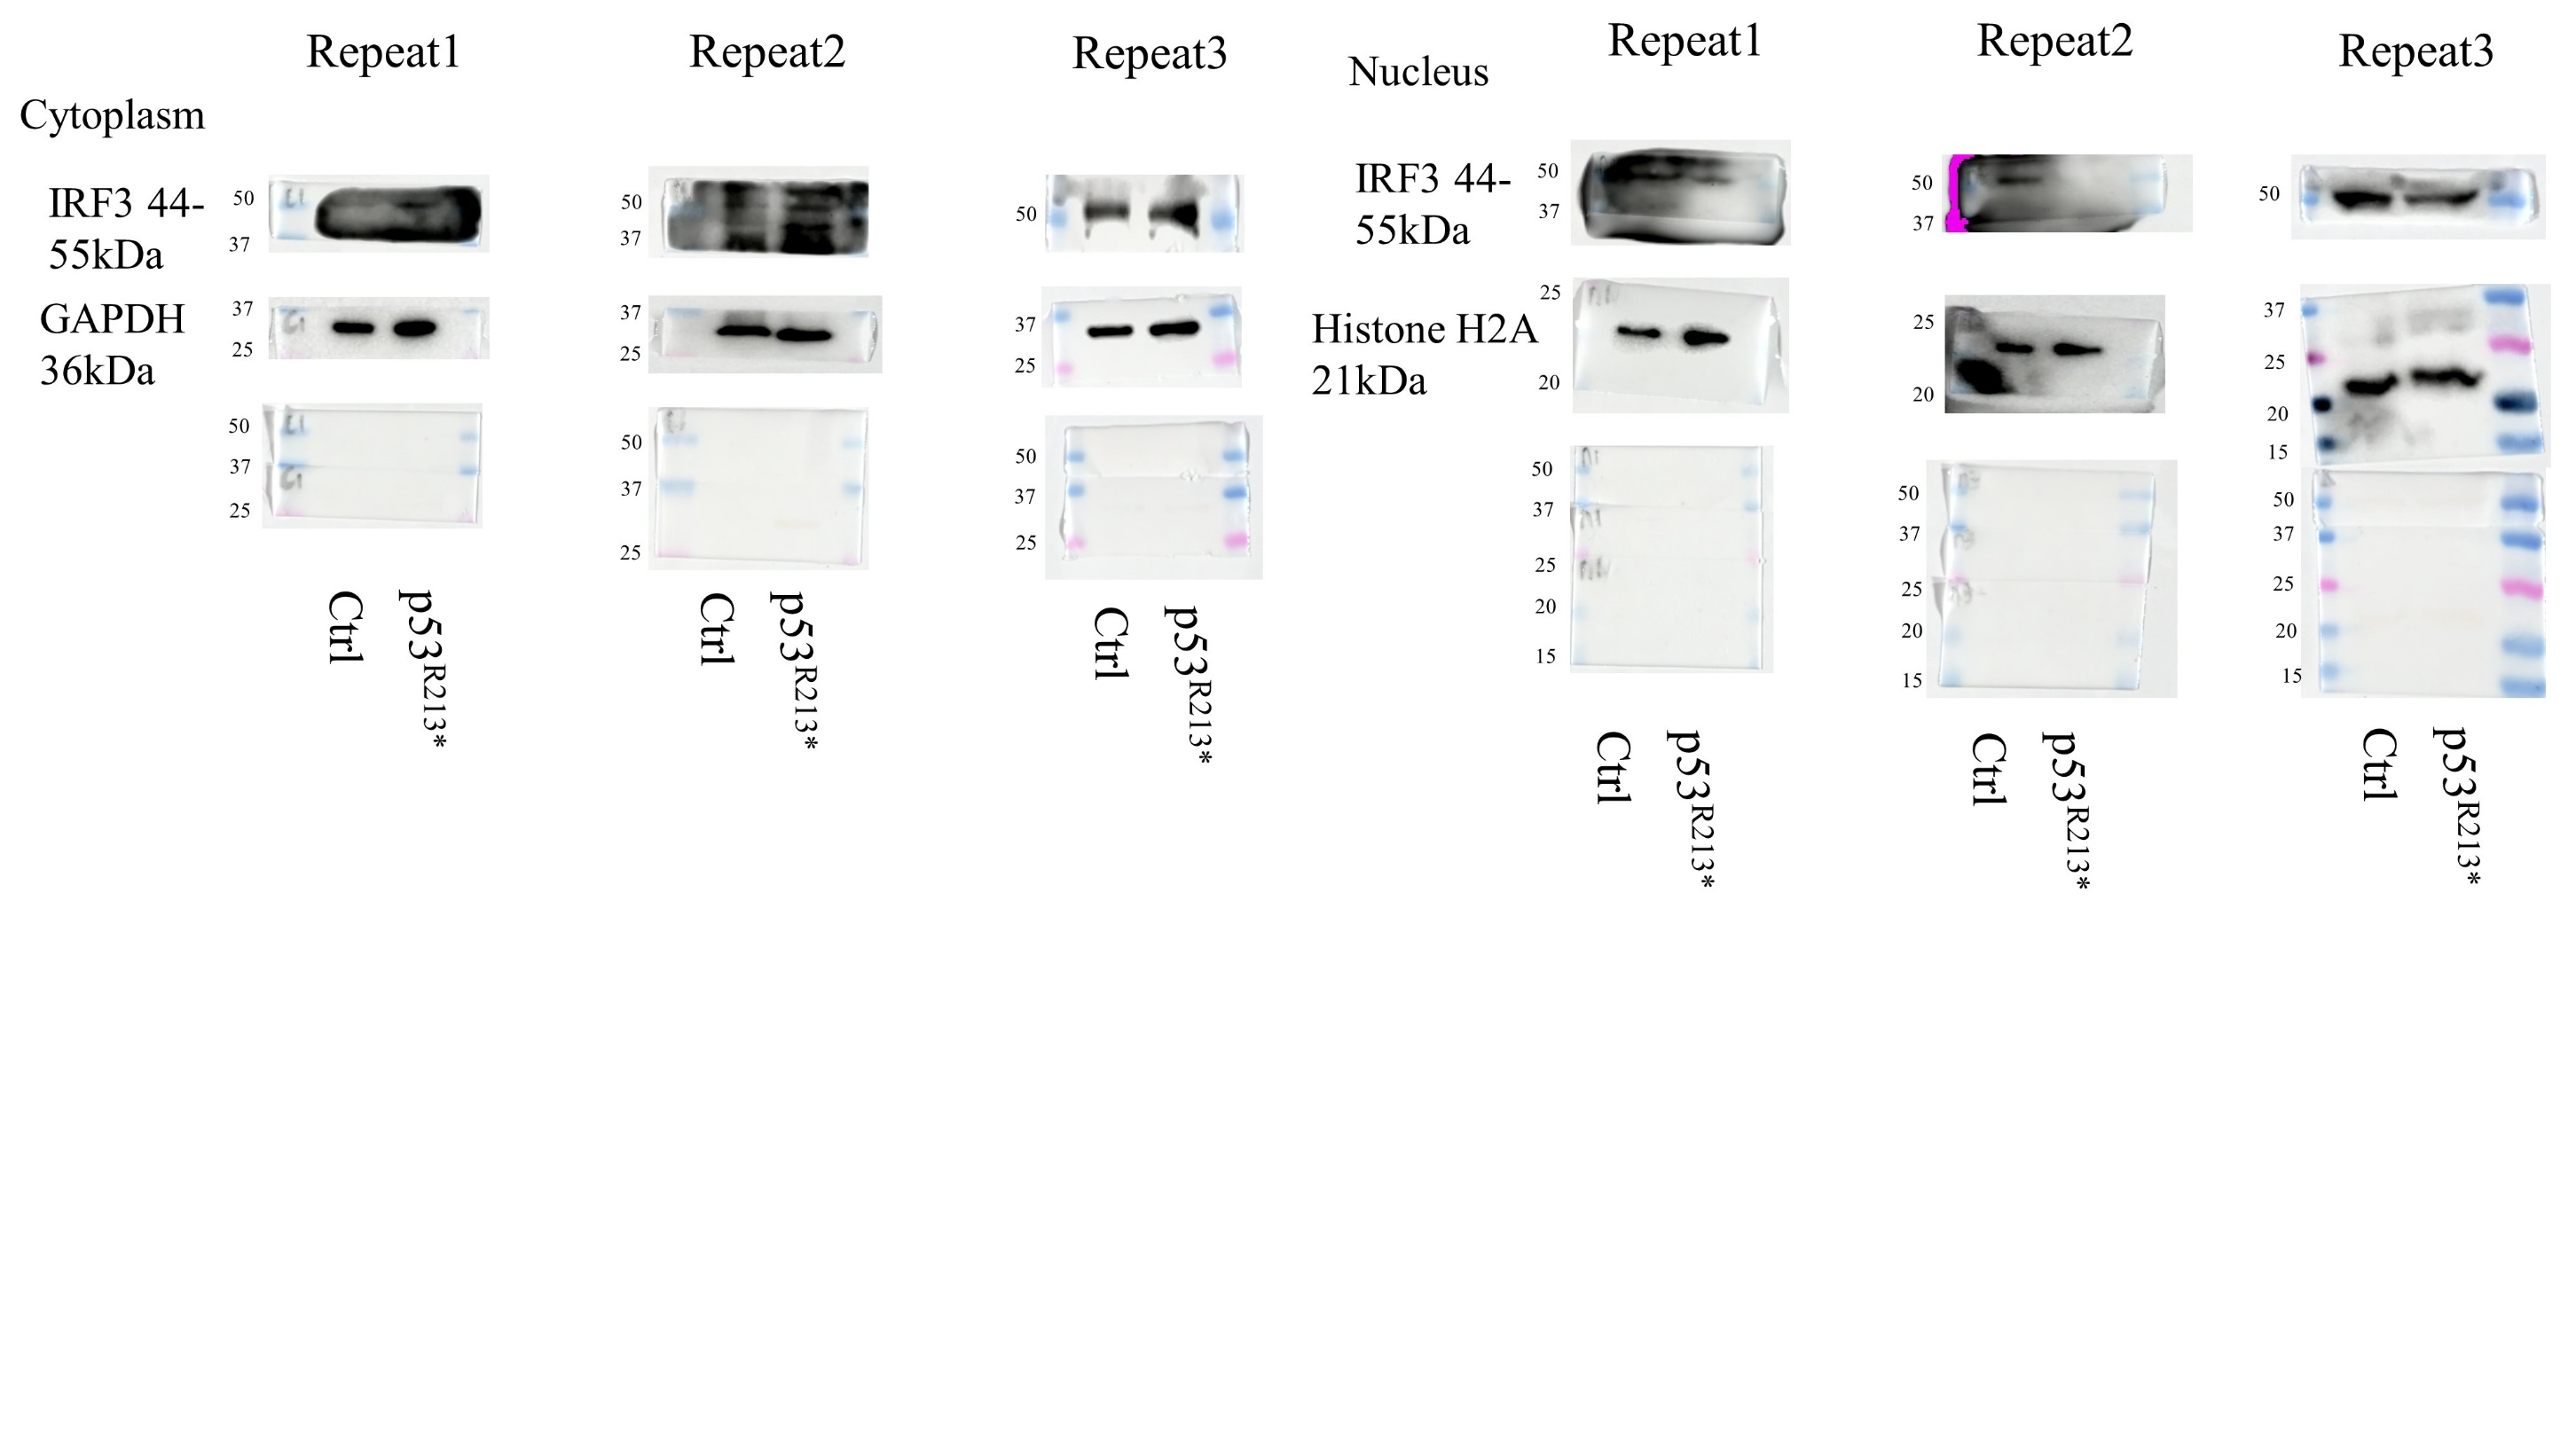

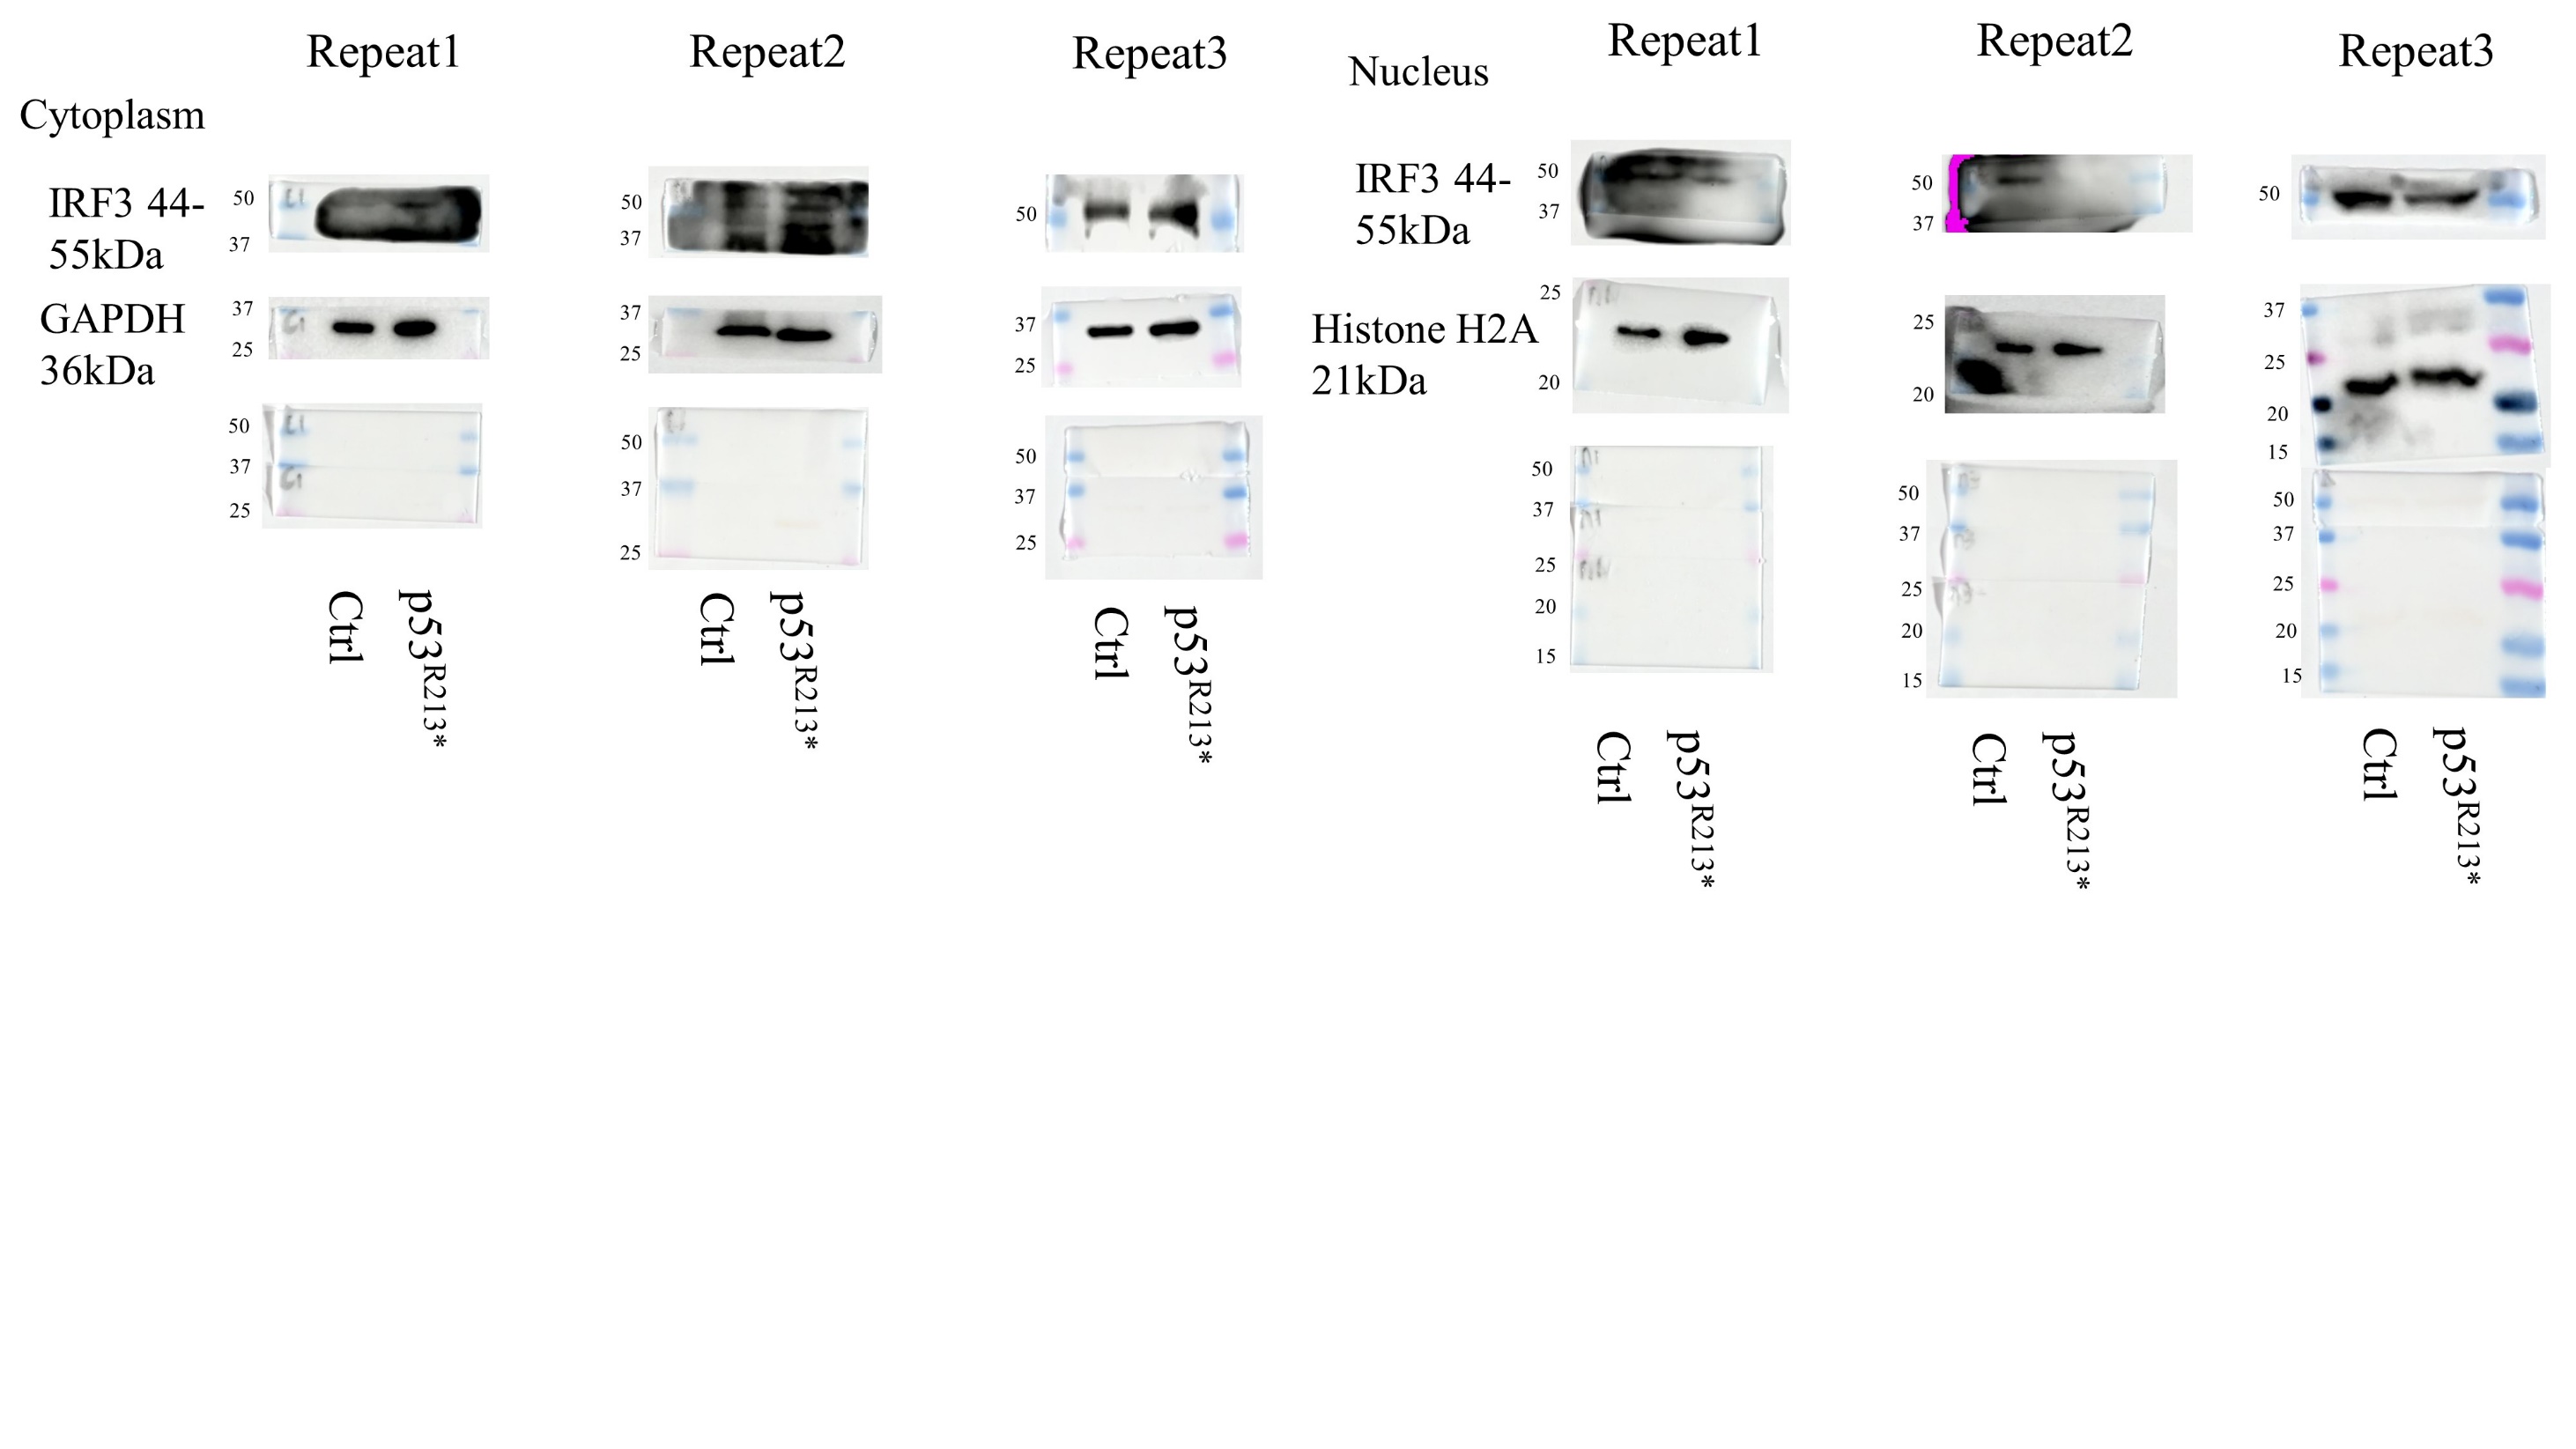
**
